# Supplementary material
Source: MDPI journal article supplement (https://www.mdpi.com/1424-2818/13/11/522)
Supplement: s1 [file s1]

**Table S1.** Specimens used in each analysis of this study, their locality and voucher number and the identification of the tissue samples used to obtain nucleotide sequences (in bold) or accession number of nucleotide sequences previously available in GenBank. N: the number of specimens included in each analysis. In the table body. **AAG-UFU:** Collection of Anuran Tissue of the Federal University of Uberlândia, Uberlândia-MG, Brazil; **CFBH:** Collection “Célio Fernando Baptista Haddad”, Departamento de Zoologia, I.B., Universidade Estadual Paulista (UNESP), Rio Claro-SP, Brazil; **DZSJRP-Amphibia Adult:** Zoological Collection of the Department of Zoology and Botany, UNESP São José do Rio Preto-SP, Brazil; **INPA-H:** Herpetological Collection of the National Institute of Amazonian Research, Manaus-AM, Brazil; **MLP DB:** Collection “Diego Baldo” deposited at the Museo de La Plata, Buenos Aires, Argentina; **MNK:** Museo de Historia Natural “Noel Kempff Mercado”, Santa Cruz de la Sierra, Bolivia; **MTR:** Collection “Miguel Trefaut Rodrigues”, Departamento de Zoologia do Instituto de Biociências da USP, São Paulo-SP, Brazil; **MZUSP:** Museu de Zoologia da USP, São Paulo-SP, Brazil; **MACN:** Museo Argentino de Ciencias Naturales “Bernardino Rivadavia”, Buenos Aires, Argentina; **SMRP:** Collection of tissue samples and chromosome preparations “Shirlei Maria Recco Pimentel”, Universidade Estadual de Campinas (UNICAMP), Campinas-SP, Brazil; **ZUEC:** Museu de Zoologia “Prof. Adão José Cardoso”, Universidade Estadual de Campinas (UNICAMP), Campinas-SP, Brazil; **ZUFG:** Museum of Zoology, Federal University of Goiás, Goiânia-GO, Brazil. **H1:** Mitochondrial fragment that includes the 12S rRNA gene, the tRNA-Valine gene and the 16S rRNA gene.

| Species or genetic lineage                              | Locality                                                | Haplotype identification (N=33) | Voucher number in museum collection | Identification of tissue sample | GenBank accession number<br>H1 or 16S | COI             | Call analysis (N=160) | Morphology/<br>Morphometry analysis (N=456/71) | Distance analysis of 16S fragment (N=110) | Phylogenetic analysis (N=124) |
|---------------------------------------------------------|---------------------------------------------------------|---------------------------------|-------------------------------------|---------------------------------|---------------------------------------|-----------------|-----------------------|------------------------------------------------|-------------------------------------------|-------------------------------|
| <b><i>Dendropsophus aff. nanus</i></b><br><br>Lineage A | Cuiabá, state of Mato Grosso, Brazil                    | H33                             | AAG UFU 5962                        | AAG UFU 1763                    | <b>MN420272</b>                       | -               | -                     | X/X                                            | X                                         | X                             |
|                                                         | Cuiabá, state of Mato Grosso, Brazil                    | -                               | AAG UFU 5736                        | -                               | -                                     | -               | X                     | X/X                                            | -                                         | -                             |
|                                                         | Cuiabá, state of Mato Grosso, Brazil                    | -                               | AAG UFU 5737                        | -                               | -                                     | -               | -                     | X/-                                            | -                                         | -                             |
|                                                         | Cuiabá, state of Mato Grosso, Brazil                    | -                               | AAG UFU 5738-39                     | -                               | -                                     | -               | X                     | X/X                                            | -                                         | -                             |
|                                                         | Cuiabá, state of Mato Grosso, Brazil                    | -                               | 2 unvouchered specimens             | -                               | -                                     | -               | X                     | -                                              | -                                         | -                             |
|                                                         | Cuiabá, state of Mato Grosso, Brazil                    | -                               | AAG UFU 5741-42                     | -                               | -                                     | -               | -                     | X/X                                            | -                                         | -                             |
|                                                         | Cuiabá, state of Mato Grosso, Brazil                    | -                               | AAG UFU 5743-48                     | -                               | -                                     | -               | -                     | X/-                                            | -                                         | -                             |
|                                                         | Cuiabá, state of Mato Grosso, Brazil                    | -                               | AAG UFU 5749                        | -                               | -                                     | -               | -                     | X/X                                            | -                                         | -                             |
|                                                         | Cuiabá, state of Mato Grosso, Brazil                    | -                               | AAG UFU 5750-51                     | -                               | -                                     | -               | -                     | X/-                                            | -                                         | -                             |
|                                                         | Cuiabá, state of Mato Grosso, Brazil                    | -                               | AAG UFU 5752-54                     | -                               | -                                     | -               | -                     | X/X                                            | -                                         | -                             |
|                                                         | Cuiabá, state of Mato Grosso, Brazil                    | -                               | AAG UFU 5755-57                     | -                               | -                                     | -               | -                     | X/-                                            | -                                         | -                             |
|                                                         | Pontal do Araguaia, state of Mato Grosso, Brazil        | -                               | AAG UFU 1085                        | SMRP 493.3                      | <b>MN420394</b>                       | -               | -                     | X/-                                            | X                                         | -                             |
|                                                         | Pontal do Araguaia, state of Mato Grosso, Brazil        | -                               | AAG UFU 3504                        | -                               | -                                     | -               | -                     | X/-                                            | -                                         | -                             |
|                                                         | Pontal do Araguaia, state of Mato Grosso, Brazil        | -                               | AAG UFU 1321                        | -                               | -                                     | -               | -                     | X/-                                            | -                                         | -                             |
|                                                         | Santa Terezinha, state of Mato Grosso, Brazil           | H28                             | ZUEC18121                           | SMRP 206.11                     | <b>MN420273</b>                       | -               | -                     | -                                              | X                                         | X                             |
|                                                         | Santo Antônio de Leverger, state of Mato Grosso, Brazil | H29                             | ZUEC 21211                          | SMRP 47.304                     | <b>MN420274</b>                       | <b>MN420337</b> | -                     | X/-                                            | X                                         | X                             |
|                                                         | Santo Antônio de Leverger, state of Mato Grosso, Brazil | H30                             | ZUEC 21212                          | SMRP 47.305                     | <b>MN420275</b>                       | <b>MN420338</b> | -                     | X/-                                            | X                                         | X                             |
|                                                         | Santo Antônio de Leverger, state of Mato Grosso, Brazil | H31                             | ZUEC 21213                          | SMRP 47.306                     | <b>MN420276</b>                       | <b>MN420339</b> | -                     | X/-                                            | X                                         | X                             |
|                                                         | Santo Antônio de Leverger, state of Mato Grosso, Brazil | H29                             | ZUEC 21214                          | SMRP 47.307                     | <b>MN420277</b>                       | <b>MN420340</b> | -                     | X/-                                            | X                                         | X                             |

|                                       |                                                      |     |                          |             |          |          |   |     |   |   |
|---------------------------------------|------------------------------------------------------|-----|--------------------------|-------------|----------|----------|---|-----|---|---|
| <i>D. aff. nanus</i><br><br>Lineage B | Aracaju, state of Sergipe, Brazil                    | H13 | ZUEC 18018               | SMRP 47.189 | MN420278 | MN420341 | - | -   | X | X |
|                                       | Araguari, state of Minas Gerais, Brazil              | -   | AAG UFU 0550-51          | -           | -        | -        | X | X/- | - | - |
|                                       | Araguari, state of Minas Gerais, Brazil              | -   | AAG UFU 2588-91          | -           | -        | -        | - | X/- | - | - |
|                                       | Araguari, state of Minas Gerais, Brazil              | -   | AAG UFU 3171-75          | -           | -        | -        | - | X/X | - | - |
|                                       | Araguari, state of Minas Gerais, Brazil              | -   | AAG UFU 3176-82          | -           | -        | -        | - | X/- | - | - |
|                                       | Araguari, state of Minas Gerais, Brazil              | -   | AAG UFU 4652-53          | -           | -        | -        | - | X/- | - | - |
|                                       | Araporã, state of Minas Gerais, Brazil               | -   | AAG UFU 1825-27          | -           | -        | -        | X | X/- | - | - |
|                                       | Assis, state of São Paulo, Brazil                    | -   | 5 unvouchered specimens  | -           | -        | -        | X | -   | - | - |
|                                       | Bacabal, state of Maranhão, Brazil                   | H11 | ZUEC 11879               | SMRP 47.129 | MN420279 | MN420342 | - | X/- | X | X |
|                                       | Bacabal, state of Maranhão, Brazil                   | H11 | ZUEC 11886               | SMRP 47.136 | MN420280 | MN420343 | - | X/- | X | X |
|                                       | Bacabal, state of Maranhão, Brazil                   | H12 | ZUEC 11887               | SMRP 47.137 | MN420281 | MN420344 | - | X/- | X | X |
|                                       | Bonfinópolis, state of Goiás, Brazil                 | -   | 9 unvouchered specimens  | -           | -        | -        | X | -   | - | - |
|                                       | Brejinho de Nazaré, state of Tocantis, Brazil        | -   | AAG UFU 0921-25          | -           | -        | -        | - | X/- | - | - |
|                                       | Brejinho de Nazaré, state of Tocantis, Brazil        | -   | 2 unvouchered specimens  | -           | -        | -        | X | -   | - | - |
|                                       | Campinas, state of São Paulo, Brazil                 | -   | ZUEC 17869               | SMRP 47.179 | MN420395 | -        | - | -   | X | - |
|                                       | Carolina, state of Maranhão, Brazil                  | -   | AAG UFU 3267             | D1397       | MN420396 | -        | X | X/X | X | - |
|                                       | Carolina, state of Maranhão, Brazil                  | -   | AAG UFU 3268             | D1398       | MN420397 | -        | - | X/X | X | - |
|                                       | Carolina, state of Maranhão, Brazil                  | -   | AAG UFU 3269             | -           | -        | -        | - | X/X | - | - |
|                                       | Carolina, state of Maranhão, Brazil                  | -   | AAG UFU 3271-72          | -           | -        | -        | - | X/X | - | - |
|                                       | Carolina, state of Maranhão, Brazil                  | -   | AAG UFU 3273-76          | -           | -        | -        | - | X/- | - | - |
|                                       | Chapada Gaúcha, state of Minas Gerais, Brazil        | -   | AAG UFU 1911             | -           | -        | -        | - | X/- | - | - |
|                                       | Goiânia, state of Goiás, Brazil                      | -   | 2 unvouchered specimens  | -           | -        | -        | X | -   | - | - |
|                                       | Goiânia, state of Goiás, Brazil                      | -   | ZUFG10258                | DNAN SON4   | MN420398 | -        | - | -   | X | - |
|                                       | Goiânia, state of Goiás, Brazil                      | -   | ZUFG10259                | DNAN SON5   | MN420399 | -        | - | -   | X | - |
|                                       | Goiânia, state of Goiás, Brazil                      | -   | 8 unvouchered specimens  | -           | -        | -        | X | -   | - | - |
|                                       | Guarani de Goiás, state of Goiás, Brazil             | -   | AAG UFU 1962             | -           | -        | -        | X | X/X | - | - |
|                                       | Guarani de Goiás, state of Goiás, Brazil             | -   | 1 unvouchered specimen   | -           | -        | -        | X | -   | - | - |
|                                       | Ituiutaba, state of Minas Gerais, Brazil             | -   | AAG UFU 0349             | -           | -        | -        | - | X/- | - | - |
|                                       | Ituiutaba, state of Minas Gerais, Brazil             | -   | AAG UFU 0457             | -           | -        | -        | - | X/- | - | - |
|                                       | Icem, state of São Paulo, Brazil                     | -   | 4 unvouchered specimens  | -           | -        | -        | X | -   | - | - |
|                                       | Lençóis Paulista, state of São Paulo, Brazil         | H14 | ZUEC 21203               | SMRP 47.283 | MN420282 | MN420345 | X | X/- | X | X |
|                                       | Lençóis Paulista, state of São Paulo, Brazil         | -   | 1 unvouchered specimen   | -           | -        | -        | X | -   | - | - |
|                                       | Limeira do Oeste, state of Minas Gerais, Brazil      | -   | AAG UFU 1242-44          | -           | -        | -        | - | X/- | - | - |
|                                       | Monte Alegre de Minas, state of Minas Gerais, Brazil | -   | AAG UFU 4369             | -           | -        | -        | - | X/- | - | - |
|                                       | Macaubal, state of São Paulo, Brazil                 | -   | 7 unvouchered specimens  | -           | -        | -        | X | -   | - | - |
|                                       | Nova Itapirema, state of São Paulo, Brazil           | H2  | ZUEC 11647               | SMRP 47.20  | MN420283 | MN420346 | - | X/- | X | X |
|                                       | Nova Itapirema, state of São Paulo, Brazil           | H4  | ZUEC 11648               | SMRP 47.21  | MN420284 | MN420347 | - | X/- | X | X |
|                                       | Nova Itapirema, state of São Paulo, Brazil           | H3  | ZUEC 11649               | SMRP 47.22  | MN420285 | MN420348 | - | X/- | X | X |
|                                       | Nova Itapirema, state of São Paulo, Brazil           | -   | 7 unvouchered specimens  | -           | -        | -        | X | -   | - | - |
|                                       | Nova Itapirema, state of São Paulo, Brazil           | -   | AAG UFU 2268-70          | -           | -        | -        | - | X/- | - | - |
|                                       | Nova Granada, state of São Paulo, Brazil             | -   | 10 unvouchered specimens | -           | -        | -        | X | -   | - | - |
|                                       | Paranã, state of Tocantins, Brazil                   | H8  | ZUEC 21221               | SMRP 47.317 | MN420286 | MN420349 | - | -   | X | X |
|                                       | Paranã, state of Tocantins, Brazil                   | H6  | ZUEC 21223               | SMRP 47.319 | MN420287 | MN420350 | - | -   | X | X |
|                                       | Paranã, state of Tocantins, Brazil                   | H8  | ZUEC 21226               | SMRP 47.327 | MN420288 | MN420351 | - | -   | X | X |
|                                       | Paranã, state of Tocantins, Brazil                   | H8  | ZUEC 21228               | SMRP 47.329 | MN420289 | MN420352 | - | -   | X | X |
|                                       | Rio Claro, state of São Paulo, Brazil                | H10 | ZUEC 18685               | SMRP 47.233 | MN420290 | MN420353 | - | X/- | X | X |
|                                       | Rio Claro, state of São Paulo, Brazil                | H5  | ZUEC 18686               | SMRP 47.234 | MN420291 | MN420354 | - | X/- | X | X |
|                                       | Rio Claro, state of São Paulo, Brazil                | H10 | ZUEC 18687               | SMRP 47.235 | MN420292 | MN420355 | - | X/- | X | X |
|                                       | São Geraldo do Araguaia, state of Pará, Brazil       | H1  | ZUEC 21234               | SMRP 47.322 | MN420293 | MN420356 | - | -   | X | X |
|                                       | São Geraldo do Araguaia, state of Pará, Brazil       | H1  | ZUEC 21235               | SMRP 47.323 | MN420294 | MN420357 | - | -   | X | X |
|                                       | São Geraldo do Araguaia, state of Pará, Brazil       | H1  | ZUEC 21236               | SMRP 47.324 | MN420295 | MN420358 | - | -   | X | X |
|                                       | São José do Rio Preto, state of São Paulo, Brazil    | H2  | ZUEC 11417               | SMRP 47.10  | MN420296 | MN420359 | - | X/- | X | X |
|                                       | São José do Rio Preto, state of São Paulo, Brazil    | -   | 3 unvouchered specimens  | -           | -        | -        | X | -   | - | - |
|                                       | Silvânia, state of Goiás, Brazil                     | -   | 9 unvouchered specimens  | -           | -        | -        | X | -   | - | - |
|                                       | Uberlândia, state of Minas Gerais, Brazil            | -   | AAG UFU 2394             | -           | -        | -        | - | X/- | - | - |
|                                       | Uberlândia, state of Minas Gerais, Brazil            | -   | AAG UFU 4166-67          | -           | -        | -        | - | X/- | - | - |

|                                                             |                                                         |     |                          |              |                 |                 |   |     |   |   |
|-------------------------------------------------------------|---------------------------------------------------------|-----|--------------------------|--------------|-----------------|-----------------|---|-----|---|---|
|                                                             | Uberlândia, state of Minas Gerais, Brazil               | -   | AAG UFU 4183             | -            | -               | -               | - | X/- | - | - |
|                                                             | Bauru, state of São Paulo, Brazil                       | H7  | CFBH1993                 | CFBHT7711    | MT503859        | MT483104        | - | -   | X | X |
| <i>D. nanus</i> A<br>(Jansen et al., 2011)<br><br>Lineage C | Cáceres, state of Mato Grosso, Brazil                   | H18 | AAG-UFU 5255             | SMRP 177.104 | <b>MN420297</b> | -               | - | X/X | X | X |
|                                                             | Cáceres, state of Mato Grosso, Brazil                   | H16 | AAG-UFU 5256             | SMRP 177.105 | <b>MN420298</b> | -               | - | X/X | X | X |
|                                                             | Cáceres, state of Mato Grosso, Brazil                   | -   | AAG-UFU 5257             | -            | -               | -               | - | X/X | - | - |
|                                                             | Cáceres, state of Mato Grosso, Brazil                   | -   | 1 unvouchered specimen   | -            | -               | -               | X | -   | - | - |
|                                                             | Cáceres, state of Mato Grosso, Brazil                   | -   | AAG-UFU 5258             | -            | -               | -               | - | X/- | - | - |
|                                                             | Santa Cruz, Nuflo de Chavez, San Sebastian, Bolivia     | -   | MNKA9495                 | -            | JF790093        | -               | - | -   | X | - |
|                                                             | Santa Cruz, Nuflo de Chavez, San Sebastian, Bolivia     | -   | MNKA9586                 | -            | JF790097        | -               | - | -   | X | - |
|                                                             | Santa Cruz, Nuflo de Chavez, San Sebastian, Bolivia     | -   | MNKA9667                 | -            | JF790098        | -               | - | -   | X | - |
|                                                             | Santa Cruz, Nuflo de Chavez, San Sebastian, Bolivia     | -   | MNKA9668                 | -            | JF790099        | -               | - | -   | X | - |
|                                                             | Santa Cruz, Nuflo de Chavez, San Sebastian, Bolivia     | -   | MNKA9675                 | -            | JF790100        | -               | - | -   | X | - |
|                                                             | Santa Cruz, Nuflo de Chavez, San Sebastian, Bolivia     | -   | MNKA9676                 | -            | JF790101        | -               | - | -   | X | - |
|                                                             | Santa Cruz, Nuflo de Chavez, San Sebastian, Bolivia     | -   | MNKA9784                 | -            | JF790102        | -               | - | -   | X | - |
|                                                             | Santa Cruz, Nuflo de Chavez, San Sebastian, Bolivia     | -   | MNKA9405                 | -            | JF790103        | -               | - | -   | X | - |
|                                                             | Santa Cruz, Nuflo de Chavez, San Sebastian, Bolivia     | -   | MNKA9408                 | -            | JF790104        | -               | - | -   | X | - |
|                                                             | Santa Cruz, Nuflo de Chavez, San Sebastian, Bolivia     | -   | MNKA9409                 | -            | JF790105        | -               | - | -   | X | - |
|                                                             | Santa Cruz, Nuflo de Chavez, San Sebastian, Bolivia     | -   | MNKA9424                 | -            | JF790106        | -               | - | -   | X | - |
|                                                             | Santa Cruz, Nuflo de Chavez, San Sebastian, Bolivia     | -   | MNKA9427                 | -            | JF790107        | -               | - | -   | X | - |
|                                                             | Santa Cruz, Nuflo de Chavez, San Sebastian, Bolivia     | -   | MNKA9824                 | -            | JX187446        | -               | - | -   | X | - |
|                                                             | Santa Cruz, Nuflo de Chavez, San Sebastian, Bolivia     | -   | MNKA10410                | -            | KF723046        | -               | - | -   | X | - |
|                                                             | Santa Cruz, Nuflo de Chavez, San Sebastian, Bolivia     | -   | SMF 94225                | -            | KF723047        | -               | - | -   | X | - |
|                                                             | Santa Cruz, Nuflo de Chavez, San Sebastian, Bolivia     | -   | MNKA10467                | -            | KF723048        | -               | - | -   | X | - |
|                                                             | Santa Cruz, Nuflo de Chavez, San Sebastian, Bolivia     | -   | MNK AS420                | -            | KF723049        | -               | - | -   | X | - |
|                                                             | Santa Cruz, Nuflo de Chavez, San Sebastian, Bolivia     | -   | MNKAS452                 | -            | KF723050        | -               | - | -   | X | - |
|                                                             | Santa Cruz, Velasco, Campamento                         | -   | MNKA9960                 | -            | JX187445        | -               | - | -   | X | - |
|                                                             | Criato, Bolivia                                         | -   | MNKA9530                 | -            | JF790094        | -               | - | -   | X | - |
|                                                             | Criato, Bolivia                                         | -   | MNKA9540                 | -            | JF790095        | -               | - | -   | X | - |
|                                                             | Criato, Bolivia                                         | -   | MNKA9578                 | -            | JF790096        | -               | - | -   | X | - |
|                                                             | Santa Cruz, Caparu, BO                                  | -   | SMF 88422                | -            | JX187441        | -               | - | -   | X | - |
|                                                             | Pontes Lacerda, state of Mato Grosso, Brazil            | H15 | ZUEC 21240               | SMRP 177.93  | <b>MN420299</b> | <b>MN420360</b> | - | -   | X | X |
|                                                             | Vilhena, state of Rondônia, Brazil                      | H17 | AAG UFU 5268             | SMRP 177.102 | <b>MN420300</b> | -               | - | X/X | X | X |
|                                                             | Vilhena, state of Rondônia, Brazil                      | -   | AAG UFU 5362             | -            | -               | -               | - | X/X | - | - |
|                                                             | Vilhena, state of Rondônia, Brazil                      | -   | AAG UFU 5364             | -            | -               | -               | - | X/X | - | - |
|                                                             | Vilhena, state of Rondônia, Brazil                      | -   | AAG UFU 5759-61          | -            | -               | -               | - | X/- | - | - |
|                                                             | Vilhena, state of Rondônia, Brazil                      | -   | 4 unvouchered specimens  | -            | -               | -               | X | -   | - | - |
| <i>D. nanus</i><br><br>Lineage E                            | Bela Vista, state of Mato Grosso do Sul, Brazil         | -   | AAG-UFU 0159             | SMRP 493.2   | <b>MN420400</b> | -               | X | X/X | X | - |
|                                                             | Bela Vista, state of Mato Grosso do Sul, Brazil         | -   | 4 unvouchered specimens  | -            | -               | -               | X | -   | - | - |
|                                                             | Bonito, state of Mato Grosso do Sul, Brazil             | -   | 3 unvouchered specimens  | -            | -               | -               | X | -   | - | - |
|                                                             | Cachoeirão, state of Mato Grosso do Sul, Brazil         | -   | 10 unvouchered specimens | -            | -               | -               | X | -   | - | - |
|                                                             | Campo Grande, state of Mato Grosso do Sul, Brazil       | -   | 2 unvouchered specimens  | -            | -               | -               | X | -   | - | - |
|                                                             | <sup>1</sup> Colonia Resistencia, Chaco, Argentina      | H27 | MLP DB4514               | MLP DB4514   | <b>MN420301</b> | <b>MN420361</b> | - | X/- | X | X |
|                                                             | <sup>1</sup> Colonia Resistencia, Chaco, Argentina      | -   | UNNEC 12429              | -            | -               | -               | X | X/X | - | - |
|                                                             | <sup>1</sup> Colonia Resistencia, Chaco, Argentina      | -   | UNNEC 12431              | -            | -               | -               | X | X/X | - | - |
|                                                             | <sup>1</sup> Colonia Resistencia, Chaco, Argentina      | -   | UNNEC 12433-39           | -            | -               | -               | X | X/X | - | - |
|                                                             | <sup>1</sup> Colonia Resistencia, Chaco, Argentina      | -   | 1 unvouchered specimen   | -            | -               | -               | X | -   | - | - |
|                                                             | Entre Rios, Argentina                                   | -   | MACN 37785               | -            | AY549346        | -               | - | -   | X | - |
|                                                             | Fênix, state of Paraná, Brazil                          | -   | 2 unvouchered specimens  | -            | -               | -               | X | -   | - | - |
|                                                             | Nova Andradina, state of Mato Grosso do Sul, Brazil     | H26 | ZUEC 21217               | SMRP 47.310  | <b>MN420302</b> | <b>MN420362</b> | - | X/- | X | X |
|                                                             | Nova Andradina, state of Mato Grosso do Sul, Brazil     | H26 | ZUEC 21218               | SMRP 47.311  | <b>MN420303</b> | <b>MN420363</b> | - | X/- | X | X |
|                                                             | Padre Murinho, state of Mato Grosso do Sul, Brazil      | -   | 1 unvouchered specimen   | -            | -               | -               | X | -   | - | - |
|                                                             | São Pedro, state of Mato Grosso do Sul, Brazil          | -   | 4 unvouchered specimens  | -            | -               | -               | X | -   | - | - |
|                                                             | Serra da Bodoquena, state of Mato Grosso do Sul, Brazil | H25 | ZUEC 13186               | SMRP 47.81   | <b>MN420304</b> | <b>MN420364</b> | - | X/- | X | X |
|                                                             | Serra da Bodoquena, state of Mato Grosso do Sul, Brazil | H25 | ZUEC11899                | SMRP 47.93   | <b>MN420305</b> | <b>MN420365</b> | - | X/- | X | X |
|                                                             | Serra da Bodoquena, state of Mato Grosso do Sul, Brazil | H25 | ZUEC 12392               | SMRP 47.171  | <b>MN420306</b> | <b>MN420366</b> | - | X/- | X | X |
|                                                             | Piraputanga, state of Mato Grosso do Sul, Brazil        | -   | 10 unvouchered specimens | -            | -               | -               | X | -   | - | - |

|                                              |                                                                                |     |                         |              |          |          |   |     |   |   |
|----------------------------------------------|--------------------------------------------------------------------------------|-----|-------------------------|--------------|----------|----------|---|-----|---|---|
|                                              | Telêmaco Borba, state of Paraná, Brazil                                        | H26 | ZUEC 12382              | SMRP 47.161  | MN420307 | MN420367 | - | X/- | X | X |
|                                              | Telêmaco Borba, state of Paraná, Brazil                                        | H26 | ZUEC 12386              | SMRP 47.165  | MN420308 | MN420368 | - | X/- | X | X |
|                                              | Telêmaco Borba, state of Paraná, Brazil                                        | H26 | ZUEC 12387              | SMRP 47.166  | MN420309 | MN420369 | - | X/- | X | X |
|                                              | Telêmaco Borba, state of Paraná, Brazil                                        | H26 | ZUEC 12388              | SMRP 47.167  | MN420310 | MN420370 | - | X/- | X | X |
|                                              | Telêmaco Borba, state of Paraná, Brazil                                        | H26 | ZUEC 12389              | SMRP 47.168  | MN420311 | MN420371 | - | X/- | X | X |
|                                              | Telêmaco Borba, state of Paraná, Brazil                                        | H26 | ZUEC 12390              | SMRP 47.169  | MN420312 | MN420372 | - | X/- | X | X |
| <i>D. walfordi</i>                           | Abunã, state of Rondônia, Brazil                                               | -   | MZUSP 104496-503        | -            | -        | -        | - | X/- | - | - |
|                                              | Borba, state of Amazônia Brazil                                                | -   | MZUSP 51199-212         | -            | -        | -        | - | X/- | - | - |
| <i>D. cf. nanus</i><br>(Jansen et al., 2011) | Belém, state of Pará, Brazil                                                   | -   | AAG UFU 3248-49         | -            | -        | -        | X | X/X | - | - |
|                                              | Belém, state of Pará, Brazil                                                   | -   | AAG UFU 3250            | AAG UFU 1403 | MN420401 | -        | X | X/X | X | - |
|                                              | Belém, state of Pará, Brazil                                                   | -   | AAG UFU 3251            | AAG UFU 1405 | MN420402 | -        | X | X/X | X | - |
|                                              | Belém, state of Pará, Brazil                                                   | -   | AAG UFU 3252-53         | -            | -        | -        | X | X/- | - | - |
|                                              | Belém, state of Pará, Brazil                                                   | -   | 1 unvouchered specimen  | -            | -        | -        | X | -   | - | - |
| Lineage D                                    | Castanho, state of Amazonas, Brazil                                            | H21 | ZUEC 12215              | SMRP 47.150  | MN420313 | MN420373 | - | -   | X | X |
|                                              | Castanho, state of Amazonas, Brazil                                            | H21 | ZUEC 12217              | SMRP 47.152  | MN420314 | MN420374 | - | -   | X | X |
|                                              | Cruzeiro do Sul, state of Acre, Brazil                                         | -   | AAG UFU 5903            | AAG UFU 1870 | MN420403 | -        | X | X/- | X | - |
|                                              | Cruzeiro do Sul, state of Acre, Brazil                                         | H32 | AAG UFU 5904            | AAG UFU 1871 | MN420315 | MN420375 | X | X/- | X | X |
|                                              | Cruzeiro do Sul, state of Acre, Brazil                                         | -   | AAG UFU 5905            | -            | -        | -        | X | X/- | - | - |
|                                              | Cruzeiro do Sul, state of Acre, Brazil                                         | -   | AAG UFU 5906            | -            | -        | -        | - | X/- | - | - |
|                                              | Curuçá, state of Amazônia, Brazil                                              | -   | MZUSP 51308-19          | -            | -        | -        | - | X/- | - | - |
|                                              | <sup>2</sup> Forte Príncipe da Beira, Costa Marques, state of Rondônia, Brazil | H24 | INPA-H 31327            | SMRP 177.97  | MN420316 | -        | - | -   | X | X |
|                                              | <sup>2</sup> Forte Príncipe da Beira, Costa Marques, state of Rondônia, Brazil | -   | MZUSP 73652             | -            | -        | -        | - | X/- | - | - |
|                                              | <sup>2</sup> Forte Príncipe da Beira, Costa Marques, state of Rondônia, Brazil | -   | MZUSP 73653             | -            | -        | -        | - | X/- | - | - |
|                                              | <sup>2</sup> Forte Príncipe da Beira, Costa Marques, state of Rondônia, Brazil | -   | MZUSP 74019-41          | -            | -        | -        | - | X/- | - | - |
|                                              | <sup>2</sup> Forte Príncipe da Beira, Costa Marques, state of Rondônia, Brazil | -   | MZUSP 74424             | -            | -        | -        | - | X/- | - | - |
|                                              | <sup>2</sup> Forte Príncipe da Beira, Costa Marques, state of Rondônia, Brazil | -   | MZUSP 129903-99         | -            | -        | -        | - | X/- | - | - |
|                                              | <sup>2</sup> Forte Príncipe da Beira, Costa Marques, state of Rondônia, Brazil | -   | MZUSP 130000-122        | -            | -        | -        | - | X/- | - | - |
|                                              | <sup>2</sup> Forte Príncipe da Beira, Costa Marques, state of Rondônia, Brazil | -   | AAG UFU 5306            | -            | -        | -        | - | X/- | - | - |
|                                              | <sup>2</sup> Forte Príncipe da Beira, Costa Marques, state of Rondônia, Brazil | -   | AAG UFU 5307-11         | -            | -        | -        | - | X/X | - | - |
|                                              | <sup>2</sup> Forte Príncipe da Beira, Costa Marques, state of Rondônia, Brazil | -   | AAG UFU 5312            | -            | -        | -        | - | X/- | - | - |
|                                              | <sup>2</sup> Forte Príncipe da Beira, Costa Marques, state of Rondônia, Brazil | -   | AAG UFU 5313-19         | -            | -        | -        | - | X/X | - | - |
|                                              | <sup>2</sup> Forte Príncipe da Beira, Costa Marques, state of Rondônia, Brazil | -   | AAG UFU 5320            | -            | -        | -        | - | X/- | - | - |
|                                              | <sup>2</sup> Forte Príncipe da Beira, Costa Marques, state of Rondônia, Brazil | -   | AAG UFU 5321-24         | -            | -        | -        | - | X/X | - | - |
|                                              | <sup>2</sup> Forte Príncipe da Beira, Costa Marques, state of Rondônia, Brazil | H22 | AAG UFU 5325            | SMRP 177.100 | MN420317 | -        | X | X/X | X | X |
|                                              | <sup>2</sup> Forte Príncipe da Beira, Costa Marques, state of Rondônia, Brazil | -   | AAG UFU 5326            | -            | -        | -        | - | X/X | - | - |
|                                              | <sup>2</sup> Forte Príncipe da Beira, Costa Marques, state of Rondônia, Brazil | -   | AAG UFU 5342            | -            | -        | -        | - | X/X | - | - |
|                                              | <sup>2</sup> Forte Príncipe da Beira, Costa Marques, state of Rondônia, Brazil | -   | 8 unvouchered specimens | -            | -        | -        | X | -   | - | - |
|                                              | Feijó, state of Acre, Brazil                                                   | -   | AAG UFU 5894            | -            | -        | -        | X | X/X | - | - |
|                                              | Guajará Mirim, state of Rondônia, Brazil                                       | H20 | ZUEC 12192              | SMRP 177.3   | MN420318 | MN420376 | - | -   | X | X |
|                                              | Guajará Mirim, state of Rondônia, Brazil                                       | H19 | ZUEC 12193              | SMRP 177.4   | MN420319 | MN420377 | - | -   | X | X |
|                                              | Guajará Mirim, state of Rondônia, Brazil                                       | -   | ZUEC 12194              | SMRP 177.5   | MN420404 | -        | - | -   | X | - |
|                                              | Itapuã do Oeste, state of Rondônia, Brazil                                     | H32 | AAG UFU 5820            | AAG UFU 1797 | MN420320 | MN420378 | - | X/X | X | X |
|                                              | Itapuã do Oeste, state of Rondônia, Brazil                                     | H32 | AAG UFU 5821            | AAG UFU 1798 | MN420321 | MN420379 | X | X/X | X | X |
|                                              | Itapuã do Oeste, state of Rondônia, Brazil                                     | H32 | AAG UFU 5822            | AAG UFU 1799 | MN420322 | MN420380 | X | X/X | X | X |
|                                              | Itapuã do Oeste, state of Rondônia, Brazil                                     | -   | AAG UFU 5823            | -            | -        | -        | - | X/X | - | - |

|                         |                                               |     |                        |              |          |          |   |     |   |   |
|-------------------------|-----------------------------------------------|-----|------------------------|--------------|----------|----------|---|-----|---|---|
|                         | Itapuã do Oeste, state of Rondônia, Brazil    | -   | AAG UFU 5824           | -            | -        | -        | - | X/X | - | - |
|                         | Itapuã do Oeste, state of Rondônia, Brazil    | -   | 1 unvouchered specimen | -            | -        | -        | X | -   | - | - |
|                         | Itapuã do Oeste, state of Rondônia, Brazil    | -   | AAG UFU 5825-29        | -            | -        | -        | - | X/- | - | - |
|                         | Los Lagos, Bolivia                            | -   | SMF 94475              | -            | KF723053 | -        | - | -   | X | - |
|                         | Los Lagos, Bolivia                            | -   | MNKA9314               | -            | KF723052 | -        | - | -   | X | - |
|                         | Los Lagos, Bolivia                            | -   | MNKA9305               | -            | JF790087 | -        | - | -   | X | - |
|                         | Los Lagos, Bolivia                            | -   | MNKA9321               | -            | JF790088 | -        | - | -   | X | - |
|                         | Los Lagos, Bolivia                            | -   | MNKA9322               | -            | JF790089 | -        | - | -   | X | - |
|                         | Los Lagos, Bolivia                            | -   | MNKA9388               | -            | JF790091 | -        | - | -   | X | - |
|                         | Los Lagos, Bolivia                            | -   | MNKA9390               | -            | JF790092 | -        | - | -   | X | - |
|                         | Los Lagos, Bolivia                            | -   | SMF 94373              | -            | KF723051 | -        | - | -   | X | - |
|                         | Rio Branco, state of Acre, Brazil             | H21 | AAG UFU 5886           | AAG UFU 1826 | MN420323 | MN420381 | - | X/- | X | X |
|                         | Rio Branco, state of Acre, Brazil             | 32  | AAG UFU 5887           | AAG UFU 1827 | MN420324 | MN420382 | X | X/- | X | X |
|                         | Rio Branco, state of Acre, Brazil             | -   | AAG UFU 5888-89        | -            | -        | -        | X | X/X | - | - |
|                         | Rio Branco, state of Acre, Brazil             | -   | AAG UFU 5890-92        | -            | -        | -        | - | X/X | - | - |
|                         | Rio Branco, state of Acre, Brazil             | -   | AAG UFU 5893-94        | -            | -        | -        | - | X/- | - | - |
|                         | Rio Branco, state of Acre, Brazil             | -   | 1 unvouchered specimen | -            | -        | -        | X | -   | - | - |
|                         | Taperinha, Santarém, state of Pará, Brazil    | H9  | NAPL 18221             | SMRP 439.4   | MN420325 | -        | - | -   | X | X |
|                         | Santa Cruz, Buena Vista, Bolivia              | -   | MNKA10435              | -            | KF723055 | -        | - | -   | X | - |
|                         | Santa Cruz, Buena Vista, Bolivia              | -   | MNKA9802               | -            | JF790090 | -        | - | -   | X | - |
|                         | Santa Cruz, Buena Vista, Bolivia              | -   | SMF 94253              | -            | KF723054 | -        | - | -   | X | - |
|                         | Santa Cruz, Ichilo, Buenavista                | -   | SMF 88421              | -            | JX187442 | -        | - | -   | X | - |
|                         | Santa Cruz, Ichilo, Buenavista                | -   | SMF 88420              | -            | JX187443 | -        | - | -   | X | - |
|                         | Santa Cruz, Ichilo, Buenavista                | -   | MNKA9989               | -            | JX187444 | -        | - | -   | X | - |
|                         | Savane Corossony, French Guiana               | -   | -                      | -            | JF973304 | -        | - | -   | X | - |
|                         | Savane Corossony, French Guiana               | -   | -                      | -            | EU201104 | -        | - | -   | X | - |
|                         | <sup>3</sup> Brazil                           | H23 | MJH129                 | -            | AY843683 | -        | - | -   | X | X |
| <i>D. anataliasiasi</i> | Barra do Garças, state of Mato Grosso, Brazil | -   | PHV2664                | -            | MT503873 | MT483105 | - | -   | - | X |
|                         | Carolina, state of Maranhão, Brazil           | -   | PHV1768                | -            | MT503874 | -        | - | -   | - | X |
| <i>D. araguaya</i>      | Araguaia, state of Mato Grosso, Brazil        | -   | PHV2558                | -            | MT503883 | MT483107 | - | -   | - | X |
|                         | Alto Taquari, state of Mato Grosso, Brazil    | -   | PHV2588                | -            | MT503882 | MT483106 | - | -   | - | X |
|                         | Campo Verde, state of Mato Grosso, Brazil     | -   | CFBH14340              | -            | MT503880 | -        | - | -   | - | X |
|                         | Araguaia, state of Mato Grosso, Brazil        | -   | PHV2560                | -            | MT503881 | MT483113 | - | -   | - | X |
| <i>D. berthaltutzae</i> | Ilha Bela, state of São Paulo, Brazil         | -   | CFBH15203              | CFBHT6306    | MT503938 | MT483202 | - | -   | - | X |
|                         | Sao Paulo, , state of São Paulo, Brazil       | -   | MZUSPFIELD1337         | -            | MT503939 | MT483203 | - | -   | - | X |
| <i>D. bipunctatus</i>   | Aurelino Leal, state of Bahia, Brazil         | -   | CFBH18721              | -            | MT503893 | MT483127 | - | -   | - | X |
|                         | Jussari, state of Bahia, Brazil               | -   | MRT5946                | -            | AY843608 | -        | - | -   | - | X |
| <i>D. braneri</i>       | Bonito, , state of Pernambuco, Brazil         | -   | CFBH20829              | CFBHT09413   | MT503865 | MT483116 | - | -   | - | X |
|                         | Aurelino Leal, state of Bahia, Brazil         | -   | CFBH18764              | CFBHT09276   | MT503866 | MT483117 | - | -   | - | X |

|                            |                                                                                        |   |                        |                  |          |          |   |   |   |   |
|----------------------------|----------------------------------------------------------------------------------------|---|------------------------|------------------|----------|----------|---|---|---|---|
| <i>D. cachimbo</i>         | Novo Progresso, state of Pará, Brazil                                                  | - | CHUNB34455             | -                | MT503889 | MT483114 | - | - | - | X |
|                            | Chapada dos Guimarães, state of Mato Grosso, Brazil                                    | - | CFBH21788              | CFBHT10174       | MT503890 | MT483115 | - | - | - | X |
| <i>D. cerradensis</i>      | Ribas do Rio Pardo, state of Mato Grosso do Sul, Brazil                                | - | CFBH32783              | -                | MT503886 | MT483110 | - | - | - | X |
|                            | Ribas do Rio Pardo, state of Mato Grosso do Sul, Brazil                                | - | CFBH32780              | -                | MT503887 | MT483111 | - | - | - | X |
| <i>D. coffea</i>           | Caranavi, La Paz, Bolivia                                                              | - | ZFMK82181              | -                | MT503858 | -        | - | - | - | X |
| <i>D. cruzi</i>            | Anápolis, state of Goiás, Brazil                                                       | - | CFBH27070              | -                | MT503867 | MT483118 | - | - | - | X |
| <i>D. elianae</i>          | Rio Claro, state of São Paulo, Brazil                                                  | - | CFBH6287               | CFBHT593         | MT503875 | -        | - | - | - | X |
|                            | Acorizal, state of Mato Grosso, Brazil                                                 | - | CFBH14148              | CFBHT4762        | MT503876 | MT483126 | - | - | - | X |
| <i>D. elegans</i>          | Sooretama, state of Espírito Santo, Brazil                                             | - | CFBH14964              | -                | MK266719 | MT483179 | - | - | - | X |
| <i>D. gaucheri</i>         | Oriximina, state of Pará, Brazil                                                       | - | ZUEC17681              | -                | MT503854 | MT483102 | - | - | - | X |
|                            | Oriximina, state of Pará, Brazil                                                       | - | ZUEC17682              | -                | MT503855 | MT483103 | - | - | - | X |
| <i>D. jimi</i>             | Botucatu, state of São Paulo, Brazil                                                   | - | CFBH25705              | -                | MT503885 | MT483109 | - | - | - | X |
|                            | Brotas, state of São Paulo, Brazil                                                     | - | CFBH21936              | CFBHT10273       | MT503884 | MT483108 | - | - | - | X |
|                            | Três Lagoas, state of Mato Grosso do Sul, Brazil                                       | - | CFBH to be included    | -                | MT503888 | MT483112 | - | - | - | X |
| <i>D. joannae</i>          | Cruzeiro do Sul, state of Acre, Brazil                                                 | - | TG2641                 | -                | MT503848 | MT483135 | - | - | - | X |
| <i>D. juliani</i>          | Madre de Dios, Pando, Peru                                                             | - | CBF:5926               | -                | MT503863 | -        | - | - | - | X |
|                            | Madre de Dios, Pando, Peru                                                             | - | NMP6V72799/3           | -                | MT503864 | -        | - | - | - | X |
| <i>D. labialis</i>         |                                                                                        |   |                        |                  |          |          | - | - | X | X |
| <i>D. leali</i>            | Madre de Dios, Cuzco, 15 km E Puerto Maldonado, 200 m, Peru                            | - | KU215258               | WED59243 ED59244 | MT503847 | MT483136 | - | - | - | X |
|                            | Madre de Dios, Cuzco, 15 km E Puerto Maldonado, 200 m, Peru                            | - | KU215259               | -                | MT503846 | -        | - | - | - | X |
| <i>D. ludekey</i>          |                                                                                        |   |                        |                  |          |          | - | - | X | X |
| <i>D. mathiasoni</i>       | Santa Maria, Boyaca, Colômbia                                                          | - | MRC686                 | -                | MT503871 | MT483122 | - | - | - | X |
|                            | Santa Maria, Boyaca, Colômbia                                                          | - | MRC687                 | -                | MT503872 | MT483123 | - | - | - | X |
| <i>D. meridensis</i>       |                                                                                        |   |                        |                  |          |          | - | - | X | X |
| <i>D. meridianus</i>       | Rio de Janeiro, state of Rio de Janeiro, Brazil                                        | - | CFBH22236              | -                | MT503895 | MT483130 | - | - | - | X |
|                            | Seropédica, state of Rio de Janeiro, Brazil                                            | - | CFBH22239              | CFBHT10940       | MT503896 | MT483131 | - | - | - | X |
|                            | Duque de Caxias, state of Rio de Janeiro, Brazil                                       | - | CFBH5418               | -                | AY843607 | -        | - | - | - | X |
| <i>D. microcephalus</i>    | Norcasia, Caldas, Colômbia                                                             | - | MHUA5883               | -                | MT503852 | MT483137 | - | - | - | X |
|                            | [a]= Honduras: Atlantida, Aldea Río Viejo;<br>[b]= Honduras: Atlantida, Nombre de Dios | - | [a]=ENS8694            | [b]= UTAA-50632  | AY843643 | -        | - | - | - | X |
| <i>D. minusculus</i>       | Boa Vista , state of Roraima, Brazil                                                   | - | CFBH29140              | CFBHT14278       | MT503870 | MT483121 | - | - | - | X |
|                            | Ubajara, state of Ceará, Brazil                                                        | - | CFBH15885              | CFBHT5392        | MT503868 | MT483119 | - | - | - | X |
|                            | Ilha Grande, state of Piauí, Brazil                                                    | - | 1 unvouchered specimen | CFBHT11320       | MT503869 | MT483120 | - | - | - | X |
| <i>D. pseudomeridianus</i> | Seropédica, state of Rio de Janeiro, Brazil                                            | - | CFBH22226              | -                | MT503897 | MT483132 | - | - | - | X |
|                            | Seropédica, state of Rio de Janeiro, Brazil                                            | - | CFBH22231              | -                | MT503898 | MT483133 | - | - | - | X |
| <i>D. reichlei</i>         | Manurupi, Pando, Bolivia                                                               | - | MJ1803                 | -                | MT503856 | -        | - | - | - | X |
|                            | Manurupi, Pando, Bolivia                                                               | - | MJ1804                 | -                | MT503857 | -        | - | - | - | X |
| <i>D. rhodopeplus</i>      | Cruzeiro do Sul, state of Acre, Brazil                                                 | - | TG2780                 | -                | MT503849 | MT483138 | - | - | - | X |
|                            | Jenaro Herrera, Loreto, Peru                                                           | - | MHZ462                 | -                | AY843658 | -        | - | - | - | X |

|                         |                                                    |   |               |            |                 |                 |   |   |   |   |
|-------------------------|----------------------------------------------------|---|---------------|------------|-----------------|-----------------|---|---|---|---|
| <i>D. riveroi</i>       | Isla de los Micos, Amazonas, Colômbia              | - | MNCN/ADN47584 | -          | MT503853        | MT483101        | - | - | - | X |
|                         | Bolivia                                            | - | MNK:A:9476    | MJ1309     | JF790110        | -               | - | - | - | X |
| <i>D. robermertensi</i> | Oaxaca, Zanatepec, México                          | - | MZFC15824     | -          | MT503850        | —               | - | - | - | X |
| <i>D. rozenmani</i>     | Bolivia                                            | - | MNCN/ADN34705 | -          | MT503891        | MT483124        | - | - | - | X |
|                         | Bolivia                                            | - | MNCN/ADN34704 | -          | MT503892        | MT483125        | - | - | - | X |
| <i>D. rubicundulus</i>  | São João d'Aliação, state of Goiás, Brazil         | - | CFBH6740      | CFBHT787   | MT503878        | -               | - | - | - | X |
|                         | Lagoa Santa, state of Minas Gerais, Brazil         | - | CFBH24352     | CFBHT11777 | MT503879        | -               | - | - | - | X |
|                         | Buri, state of São Paulo, Brazil                   | - | IT-H0653      | -          | AY843661        | -               | - | - | - | X |
| <i>D. sanborni</i>      | Rio Claro, state of São Paulo, Brazil              | - | CFBH14300     | CFBHT5313  | MT503877        | -               | - | - | - | X |
|                         | Entre Rios, Dto Islas del Ibicuy, Argentina        | - | BB766         | MACN38638  | AY843663        | -               | - | - | - | X |
| <i>D. sartori</i>       | no data                                            | - | JAC22080      | -          | MT503851        | -               | - | - | - | X |
|                         | Guerrero, Mexico                                   | - | MZFC16014     | -          | AY819453        | -               | - | - | - | X |
| <i>D. shiwiarum</i>     | Sucumbios, Lago Agrios, Ecuador                    | - | KU217607      | LAC1968    | MT503861        | -               | - | - | - | X |
|                         | Sucumbios, Lago Agrios, Ecuador                    | - | KU217613      | LAC1974-GB | MT503862        | MT483140        | - | - | - | X |
|                         | Cruzeiro do Sul, state of Acre, Brazil             | - | TG2819        | -          | MT503860        | MT483139        | - | - | - | X |
| <i>D. studerae</i>      | Quebrangulo, state of Alagoas, Brazil              | - | URCAG767      | -          | MT503894        | MT483128        | - | - | - | X |
|                         | Quebrangulo, state of Alagoas, Brazil              | - | URCAG768      | -          | -               | MT483129        | - | - | - | X |
| <i>D. triangulum</i>    | Ilha Xiborema, Lago Catalão, state of Acre, Brazil | - | MJH3844       | -          | AY843680        | -               | - | - | - | X |
| <i>D. werneri</i>       | Peruibe, state of São Paulo, Brazil                | - | CFBH7053      | -          | MT503899        | -               | - | - | - | X |
|                         | Pariquera-Acu, state of São Paulo, Brazil          | - | CFBHT4969     | CFBH14761  | MT503900        | MT483134        | - | - | - | X |
|                         | São Vicente, state of São Paulo, Brazil            | - | ZUEC 16316    | SMRP 329.1 | <b>MN420336</b> | <b>MN420393</b> | - | - | - | X |

<sup>1</sup>Type locality of *D. nanus*. <sup>2</sup>Type locality of *D. walfordii*.
