# Supplementary material
Source: MDPI journal article supplement (https://www.mdpi.com/1424-2818/13/11/522)
Supplement: s1 [file s1]

**Table S2.** Advertisement call values (mean  $\pm$  standard deviation) obtained from 160 specimens of Lineages A, B, C and E, including the topotype of *D. nanus* (\*), and six specimens of Clade D, including the topotype of *D. walfordi* (\*\*). N: Number of sampled individuals. The amplitude of each acoustic parameter is presented in parentheses below the mean and SD, the number of notes analyzed are presented in brackets. Call vouchers represent either the identification number or the label of each recording deposited in one of the following scientific collections: Fonoteca Neotropical Jacques Vielliard (FNJV), a sound collection of the Museum of Zoology “Adão José Cardoso”, in the University of Campinas (UNICAMP), Campinas-SP, Brazil; Museu de Biodiversidade do Cerrado (MBC), in the Federal University of Uberlândia, Uberlândia-MG, Brazil.

| Lineage | Localities                | Note A                                |                                    |                                     |                                            |                                                | Note B                                |                                 |                                    |                                            |                                                   | Call group rate                     | Notes per sequence              | Call voucher in FNJV or call label in MBC collection                                                                                                                                                           |
|---------|---------------------------|---------------------------------------|------------------------------------|-------------------------------------|--------------------------------------------|------------------------------------------------|---------------------------------------|---------------------------------|------------------------------------|--------------------------------------------|---------------------------------------------------|-------------------------------------|---------------------------------|----------------------------------------------------------------------------------------------------------------------------------------------------------------------------------------------------------------|
|         |                           | Note duration (ms)                    | Number of pulses                   | Pulse duration (ms)                 | Pulse rate                                 | Peak frequency                                 | Note duration (ms)                    | Number of pulses                | Pulse duration (ms)                | Pulse rate                                 | Peak frequency                                    |                                     |                                 |                                                                                                                                                                                                                |
| A       | Cuiabá – MT (N = 5)       | 31.7 $\pm$ 2.3<br>(24.0-40.0)<br>[28] | 11.2 $\pm$ 2.1<br>(8-17)<br>[28]   | 29.3 $\pm$ 0.3<br>(1.0-8.0)<br>[52] | 352.5 $\pm$ 52.1<br>(300-500) [28]         | 4716.6 $\pm$ 153.9<br>(4479.9-4995.7) [28]     | 15.2 $\pm$ 0.8<br>(11.0-19.0)<br>[33] | 5.5 $\pm$ 0.9<br>(4-8)<br>[33]  | 28.6 $\pm$ 0.4<br>(1.0-4.0) [52]   | 361.8 $\pm$ 41.8<br>(222.2-538.5)<br>[33]  | 4698.3 $\pm$ 149.4<br>(4435.8-4952.6) [330]       | 4.1 $\pm$ 0.2<br>(3.42-5.2)<br>[23] | 4.0 $\pm$ 2.0<br>(2-11)<br>[41] | Dendrop_cf_nanusCuiabaMT20aTRC_AAGm671<br>Dendrop_cf_nanusCuiabaMT15aDLB_AAGm671<br>Dendrop_cf_nanusCuiabaMT16aDLB_AAGm671<br>Dendrop_cf_nanusCuiabaMT18aDLB_AAGm671<br>Dendrop_cf_nanusCuiabaMT19aDLB_AAGm671 |
| B       | L. Paulista – SP (N = 2)  | 53.9 $\pm$ 6.1<br>(50-58)<br>[10]     | 12.70 $\pm$ 1.6<br>(12-14)<br>[10] | 4.0 $\pm$ 0.2<br>(3.9-4.1)<br>[10]  | 235.30 $\pm$ 2.5<br>(233.5-237.1)<br>[10]  | 3975.03 $\pm$ 225.4<br>(3815.7-4134.4)<br>[10] | 22.8 $\pm$ 4.5<br>(20-26)<br>[04]     | 4.83 $\pm$ 1.6<br>(4-6)<br>[04] | 4.8 $\pm$ 0.9<br>(4.2-5.4)<br>[04] | 208.53 $\pm$ 31.4<br>(186.3-230.8)<br>[04] | 4048.25 $\pm$ 304.55<br>(3832.90-4263.60)<br>[04] | 5.8 $\pm$ 0.1<br>(5.7-5.9)<br>[04]  | 2.0 $\pm$ 0<br>(2)<br>[04]      | Dendropsophus_nanus_Lençois Paulista<br>Dendropsophus_nanus_2_Lençois Paulista                                                                                                                                 |
|         | Carolina – MA (N = 1)     | 36.9 $\pm$ 0.0<br>(34.0-42.0)<br>[10] | 12.8 $\pm$ 0.0<br>(11-16)<br>[10]  | 3.0 $\pm$ 0.0<br>(2.0-4.0)<br>[14]  | 346.3 $\pm$ 0.0<br>(323.5-421.1) [10]      | 5062.5 $\pm$ 0.0<br>(4968.8-5250.0) [10]       | 18.7 $\pm$ 0.0<br>(15.0-23.0)<br>[10] | 6.7 $\pm$ 0.0<br>(5-8)<br>[10]  | 27.5 $\pm$ 0.0<br>(2.0-4.0) [12]   | 356.1 $\pm$ 0.0<br>(333.3-381.0)<br>[10]   | 5132.8 $\pm$ 0.0<br>(5015.6-5296.9) [10]          | 4.2 $\pm$ 0.0<br>(3.7-4.7)<br>[10]  | 2.1 $\pm$ 0.0<br>(2-3)<br>[18]  | Dendrop_nanusCarolinaMA1aBFVT_AAGmt                                                                                                                                                                            |
|         | Macaubal – SP (N = 7)     | 39.9 $\pm$ 4.4<br>(34-47)<br>[35]     | 12.59 $\pm$ 1.1<br>(12-15)<br>[35] | 3.3 $\pm$ 0.3<br>(3.1-3.6)<br>[09]  | 306.78 $\pm$ 27.4<br>(275.3-325.1)<br>[09] | 4386.61 $\pm$ 167.5<br>(4134.4-4677.0)<br>[09] | 17.6 $\pm$ 2.9<br>(13-22)<br>[35]     | 4.20 $\pm$ 1.3<br>(2-6)<br>[35] | 5.7 $\pm$ 2.4<br>(3.4-8.2)<br>[09] | 204.36 $\pm$ 87.2<br>(122.5-296.1)<br>[09] | 4380.46 $\pm$ 154.8<br>(4143.0-4625.3)<br>[35]    | 6.9 $\pm$ 0.2<br>(6.7-7)<br>[09]    | 5.5 $\pm$ 3.3<br>(2-11)<br>[28] | FNJV0044014-20                                                                                                                                                                                                 |
|         | N. Itapirema - SP (N = 7) | 35.7 $\pm$ 6.3<br>(24-44)<br>[30]     | 10.53 $\pm$ 2.2<br>(6-13)<br>[30]  | 3.6 $\pm$ 0.4<br>(3.2-3.9)<br>[09]  | 284.44 $\pm$ 30.3<br>(256.4-316.1)<br>[09] | 4212.09 $\pm$ 90.3<br>(4112.9-4384.2)<br>[30]  | 17.6 $\pm$ 2.9<br>(15-23)<br>[35]     | 4.14 $\pm$ 0.8<br>(3-5)<br>[35] | 4.6 $\pm$ 0.5<br>(4.2-5.1)<br>[09] | 221.74 $\pm$ 23.8<br>(196.4-243.6)<br>[09] | 4187.29 $\pm$ 86.2<br>(4039.6-4272.2)<br>[35]     | 5.2 $\pm$ 0.3<br>(4.8-5.4)<br>[09]  | 5.3 $\pm$ 4.3<br>(2-13)<br>[23] | FNJV0044007-12                                                                                                                                                                                                 |

|  |                                            |                                 |                              |                                |                                          |                                              |                                 |                           |                                |                                      |                                              |                               |                            |                                                                                                             |
|--|--------------------------------------------|---------------------------------|------------------------------|--------------------------------|------------------------------------------|----------------------------------------------|---------------------------------|---------------------------|--------------------------------|--------------------------------------|----------------------------------------------|-------------------------------|----------------------------|-------------------------------------------------------------------------------------------------------------|
|  | <b>Bonfinópolis – GO<br/>(N = 9)</b>       | 50.0±3.7<br>(44-54)<br>[45]     | 12.60±1.0<br>(11-14)<br>[45] | 3.9±0.4<br>(3.6-4.3)<br>[09]   | 260.77±22<br>.1<br>(235.3-275.5)<br>[09] | 4250.69±128<br>.6<br>(4031.0-4418.6)<br>[45] | 25.4±3.8<br>(22-32)<br>[45]     | 6.40±0.9<br>(5-8)<br>[45] | 3.8±0.2<br>(3.6-4.0)<br>[09]   | 267.51±10.4<br>(257.1-277.9)<br>[09] | 4236.52±126<br>.1<br>(4039.6-4470.3)<br>[45] | 4.4±0.4<br>(3.9-4.7)<br>[09]  | 3.6±0.8<br>(2-5)<br>[09]   | FNJV0044031-39                                                                                              |
|  | <b>Silvânia – GO<br/>(N = 9)</b>           | 34.5±5.8<br>(28-45)<br>[42]     | 10.88±1.7<br>(8-13)<br>[42]  | 3.2±0.4<br>(2.8-3.6)<br>[09]   | 317.15±44<br>.0<br>(279.1-365.4)<br>[09] | 4346.90±158<br>.4<br>(4091.3-4633.9)<br>[42] | 18.8±3.3<br>(15-23)<br>[45]     | 5.84±1.0<br>(4-8)<br>[45] | 3.5±0.7<br>(3.0-4.3)<br>[09]   | 297.29±53.2<br>(236.7-336.0)<br>[09] | 4327.69±139<br>.2<br>(4056.8-4530.6)<br>[45] | 5.2±0.4<br>(4.9-5.7)<br>[09]  | 6.1±4.2<br>(3-15)<br>[36]  | FNJV0044040 - 48                                                                                            |
|  | <b>Goiânia – GO<br/>(N = 10)</b>           | 37.2±4.0<br>(31-43)<br>[50]     | 10.74±1.0<br>(9-13)<br>[50]  | 3.4±0.2<br>(3.2-3.5)<br>[09]   | 296.78±17<br>.7<br>(283.2-316.8)<br>[09] | 4310.07±103<br>.2<br>(4143.0-4478.9)<br>[50] | 23.9±0.7<br>(23-25)<br>[50]     | 5.46±0.9<br>(3-6)<br>[50] | 4.0±1.0<br>(3.2-5.1)<br>[09]   | 263.57±57.1<br>(200.8-312.4)<br>[09] | 4317.83±100<br>.5<br>(4143.0-4470.3)<br>[50] | 5.5±0.8<br>(4.5-6)<br>[09]    | 3.6±0.8<br>(2-5)<br>[39]   | FNJV0044049 - 58                                                                                            |
|  | <b>Araguari – MG<br/>(N = 2)</b>           | 31.4±1.2<br>(27.0-37.0)<br>[14] | 8.3±0.5<br>(7-10)<br>[14]    | 3.6±0.3<br>(2.0-7.0)<br>[34]   | 263.7±6.2<br>(255.8-294.1)<br>[14]       | 4057.0±25.8<br>(4031.2-4125.0)<br>[14]       | 19.3±1.0<br>(14.0-22.0)<br>[20] | 4.5±0.2<br>(3-6)<br>[20]  | 38.2±0.7<br>(1.0-11.0)<br>[25] | 234.0±21.3<br>(166.7-300)<br>[20]    | 4054.7±18.8<br>(4031.2-4125.0)<br>[20]       | 3.3±0.03<br>(3.1-3.5)<br>[13] | 3.0±0.3<br>(2-6)<br>[18]   | Dendrop_nanusAraguariMG1aAAGb<br>Dendrop_nanusAraguariMG2aAAGmt                                             |
|  | <b>Brejinho de Nazaré – TO<br/>(N = 2)</b> | 31.1±0.5<br>(24.0-35.0)<br>[17] | 10.0±0.2<br>(9-12)<br>[17]   | 3.0.±<0.1<br>(1.0-7.0)<br>[35] | 324.1±0.9<br>(285.7-375.0)<br>[17]       | 4713.6±7.4<br>(4640.6-4734.4)<br>[17]        | 17.2±0.2<br>(14.0-21.0)<br>[15] | 4.5±0.03<br>(4-6)<br>[15] | 3.8±<0.1<br>(2.0-9.0)<br>[24]  | 263.0±2.9<br>(214.3-333.3)<br>[14]   | 4708.8±8.0<br>(4687.5-4734.4)<br>[15]        | 4.0±0.1<br>(2.9-4.4)<br>[22]  | 4.0±0.04<br>(2-10)<br>[23] | Dendrop_nanusBrejinhoNazareTO1aTRC_AAGmt<br>Dendrop_nanusBrejinhoNazareTO1aBFVT_AAGmt                       |
|  | <b>Guarani de Goiás – GO<br/>(N = 2)</b>   | 31.2±1.5<br>(24.0-37.0)<br>[15] | 9.1±0.009<br>(7-11)<br>[15]  | 3.3±0.3<br>(2.0-6.0)<br>[33]   | 296.5±11.4<br>(216.2-333.3)<br>[15]      | 4483.7±177.0<br>(4265.6-4828.1)<br>[15]      | 14.3±0.4<br>(12.0-16.0)<br>[20] | 3.8±0.1<br>(3-5)<br>[20]  | 4.2±<0.1<br>(2.0-9.0)<br>[22]  | 265.3±0.2<br>(214.3-357.1)<br>[20]   | 4521.1±166.4<br>(4265.6-4875.0)<br>[20]      | 5.0±0.2<br>(3.7-6.5)<br>[10]  | 6.3±0.6<br>(2-11)<br>[12]  | Dendrop_nanusGuaraniGoiiasGO1bTRC_AAGm671<br>Dendrop_nanusGuaraniGoiiasGO2aBFVT_AAGmt                       |
|  | <b>N. Granada – SP<br/>(N = 10)</b>        | 35.1±5.0<br>(27-42)<br>[50]     | 10.82±1.5<br>(9-13)<br>[50]  | 2.9±0.2<br>(2.7-3.1)<br>[09]   | 343.41±27.9<br>319.2-373.9<br>[09]       | 4382.43±116.9<br>(4220.5-4565.0)<br>[50]     | 22.5±5.5<br>(13-32)<br>[50]     | 5.16±1.2<br>(3-7)<br>[50] | 3.5±0.2<br>(3.3-3.7)<br>[09]   | 290.37±17.5<br>(279.5-310.5)<br>[09] | 4387.60±164.0<br>(4211.9-4754.5)<br>[50]     | 7.2±0.4<br>(6.7-7.5)<br>[09]  | 4.3±1.7<br>(3-9)<br>[40]   | FNJV0044021 - 30                                                                                            |
|  | <b>Icém – SP<br/>(N=4)</b>                 | 35.2±2.7<br>(32-38)<br>[20]     | 11.35±0.6<br>(11-12)<br>[20] | 3.1±0.4<br>(2.6-3.5)<br>[19]   | 324.59±39.7<br>(290.7-380.7)<br>[19]     | 4485.36±97.5<br>(4341.1-4556.4)<br>[20]      | 18.4±0.6<br>(18-19)<br>[17]     | 5.13±0.9<br>(4-6)<br>[17] | 3.7±0.7<br>(3.2-4.7)<br>[17]   | 277.27±44.8<br>(216.6-324.6)<br>[17] | 4486.44±71.0<br>(4392.8-4565.0)<br>[17]      | 7.1±1.2<br>(6-8.6)<br>[11]    | 2.7±0.5<br>(2-3)<br>[04]   | FNJV 0044892<br>FNJV 0044893<br>FNJV 0044894<br>FNJV 0044895                                                |
|  | <b>Araporã – MG<br/>(N = 3)</b>            | 41.1±5.3<br>(28.0-51.0)<br>[30] | 10.5±0.8<br>(8-13)<br>[30]   | 3.8±0.3<br>(2.0-7.0)<br>[72]   | 258.5±16.0<br>(215.7-285.7)<br>[30]      | 4445.3±50.3<br>(4312.5-4546.9)<br>[30]       | 23.4±3.0<br>(18.0-29.0)<br>[28] | 6.2±0.7<br>(5-8)<br>[28]  | 35.8±0.4<br>(3.0-7.0)<br>[54]  | 264.2±23.8<br>(178.6-320)<br>[28]    | 4434.7±48.9<br>(4359.4-4546.9)<br>[28]       | 3.2±0.3<br>(2.6-3.5)<br>[24]  | 2.7±0.5<br>(2-7)<br>[62]   | Dendrop_nanusAraporaMG1aLBM_AAGmt<br>Dendrop_nanusAraporaMG2aLBM_AAGmt<br>Dendrop_nanusAraporaMG3bLBM_AAGmt |
|  | <b>SJRP – SP<br/>(N = 3)</b>               | 49.7±5.2<br>(46-56)<br>[15]     | 11.93±0.3<br>(12)<br>[15]    | 4.3±0.6<br>(4.0-5.0)<br>[15]   | 241.60±22.4<br>(215.8-255.9)<br>[15]     | 4180.33±72.2<br>(4134.4-4263.6)<br>[15]      | 24.4±0.7<br>(24-25)<br>[15]     | 5.13±1.3<br>(4-6)<br>[15] | 5.3±1.5<br>(4.0-7.0)<br>[15]   | 210.01±58.2<br>(149.7-265.7)<br>[15] | 4128.63±73.3<br>(4056.8-4203.3)<br>[15]      | 4.7±0.4<br>(4.4-5.2)<br>[10]  | 8.2±7.4<br>(4-17)<br>[10]  | FNJV 0044887<br>FNJV 0044888<br>FNJV 0044889                                                                |

|   |                               |                                     |                              |                                |                                              |                                                  |                                  |                           |                                    |                                      |                                                  |                               |                           |                                                                                                                                                                                                                                                                                                                                                                                                                                                       |
|---|-------------------------------|-------------------------------------|------------------------------|--------------------------------|----------------------------------------------|--------------------------------------------------|----------------------------------|---------------------------|------------------------------------|--------------------------------------|--------------------------------------------------|-------------------------------|---------------------------|-------------------------------------------------------------------------------------------------------------------------------------------------------------------------------------------------------------------------------------------------------------------------------------------------------------------------------------------------------------------------------------------------------------------------------------------------------|
|   | Assis – SP<br>(N = 5)         | 48.8±5.1<br>(43-55)<br>[25]         | 12.96±1.0<br>(12-14)<br>[25] | 3.7±0.2<br>(3.5-4.1)<br>[25]   | 266.68±15<br>.4<br>(249.7-<br>286.5)<br>[25] | 4089.58±150<br>.0<br>(3884.6-<br>4298.0)<br>[25] | 23.7±3.7<br>(18-28)<br>[25]      | 5.78±0.7<br>(5-6)<br>[25] | 4.1±0.3<br>(3.7-4.5)<br>[25]       | 245.48±18.5<br>(222.0-265.8)<br>[25] | 4053.41±116<br>.0<br>(3944.9-<br>4237.7)<br>[25] | 6.1±0.9<br>(5.2-7.5)<br>[16]  | 2.2±0.4<br>(2-3)<br>[16]  | FNJV 0044896<br>FNJV 0044897<br>FNJV 0044898<br>FNJV 0044899<br>FNJV 0044900                                                                                                                                                                                                                                                                                                                                                                          |
| C | Caceres – MT<br>(N = 1)       | 34.±0.0<br>(31.0-<br>43.0)<br>[10]  | 12.7±0.0<br>(11-18)<br>[10]  | 2.9±0.0<br>(2.0-7.0)<br>[13]   | 366.8±0.0<br>(333.3-<br>500) [10]            | 4598.5±0.0<br>(4453.1-<br>4828.1) [10]           | 15.0±0.0<br>(10.0-19.0)<br>[10]  | 5.8±0<br>(5-8)<br>[10]    | 2.4±0.0<br>(1.0-3.0)<br>[10]       | 397.4±0.0<br>(315.9-500.0)<br>[10]   | 4621.9±0.0<br>(4500.0-<br>4781.2) [10]           | 4.3±0.0<br>4.1-4.4)<br>[4]    | 2.4±0.0<br>(2-4)<br>[13]  | Dendrop_nanusCaceresMT6bFSA_AAAGm671                                                                                                                                                                                                                                                                                                                                                                                                                  |
|   | Vilhena – RO<br>(N=4)         | 4.5±3.9<br>(36.0-<br>54.0)<br>[37]  | 12.6±1.2<br>(9-17)<br>[37]   | 36.2±0.4<br>(2.0-13.0)<br>[54] | 283.0±12.<br>9 (243.2-<br>333.3) [37]        | 4307.8±163.<br>3 (4031.2-<br>4593.8) [37]        | 20.7±2.4<br>(10.0-32.0)<br>[40]  | 5.6±0.8<br>(4-8)<br>[40]  | 4.0±0.5<br>(1.0-<br>14.0)<br>[52]  | 270.5±18.6<br>(190.5-352.9)<br>[40]  | 4341.5±135.<br>5 (4171.9-<br>4734.4) [43]        | 4.9±1.0<br>(3.7-7.2)<br>[20]  | 3.1±0.8<br>(2-8)<br>[41]  | Dendrop_nanusVilhenaRO1bAAGm671<br>Dendrop_nanusVilhenaRO2bAAGm671<br>Dendrop_nanusVilhenaRO3dAAGm671<br>Dendrop_nanusVilhenaRO4aAAGm671                                                                                                                                                                                                                                                                                                              |
| E | Resistencia – AR*<br>(N = 10) | 41.2±4.4<br>(29.0-<br>56.0) [145]   | 10.9±1.3<br>(7-15)<br>[124]  | 3.7±0.2<br>(2.0-11.0)<br>[163] | 265.8±20.<br>9 (194-<br>351) [124]           | 4246.4±165.<br>2 (3703.1-<br>4546.9) [145]       | 21.1±2.7<br>(13.0-31.0)<br>[134] | 439±1.0<br>(3-9)<br>[111] | 4.2±0.7<br>(2.0-<br>14.0)<br>[113] | 244.5±34.9<br>(142.9-360)<br>[113]   | 4259.5±135.<br>4 (3937.5-<br>4593.8) [134]       | 3.9±0.3<br>(2.63-4.7)<br>[86] | 2.4±0.4<br>(2-6)<br>[326] | Dendrop_nanus_Resistencia_AR_1a_BFVT_Mtc<br>Dendrop_nanus_Resistencia_AR_2a_BFVT_Mtc<br>Dendrop_nanus_Resistencia_AR_3a_BFVT_Mtc<br>Dendrop_nanus_Resistencia_AR_4a_BFVT_Mtc<br>Dendrop_nanus_Resistencia_AR_5a_BFVT_Mtc<br>Dendrop_nanus_Resistencia_AR_6a_BFVT_Mtc<br>Dendrop_nanus_Resistencia_AR_7a_BFVT_Mtc<br>Dendrop_nanus_Resistencia_AR_8a_BFVT_Mtc<br>Dendrop_nanus_Resistencia_AR_9a_BFVT_Mtc<br>Dendrop_nanus_Resistencia_AR_10a_BFVT_Mtc |
|   | Bonito – MS<br>(N = 3)        | 35.2±6.1<br>(30-42)<br>[12]         | 10.00±1.7<br>(9-12)<br>[12]  | 3.5±0.3<br>(3.3-3.8)<br>[12]   | 284.85±24<br>.3<br>(259.0-<br>307.3)<br>[12] | 4923.93±670<br>.4<br>(4220.5-<br>5555.6)<br>[12] | 16.5±0<br>(16.5)<br>[04]         | 5.25±0<br>(5.25)<br>[04]  | 4.1±0<br>(4.1)<br>[04]             | 318.28±0<br>(318.28)<br>[04]         | 4274.33±0<br>(4274.33)<br>[04]                   | -                             | -                         | FNJV 0044901<br>FNJV 0044902<br>FNJV 0044903                                                                                                                                                                                                                                                                                                                                                                                                          |
|   | Bela Vista –MS<br>(N = 5)     | 30.1±6.2<br>(20.0-<br>38.0)<br>[29] | 10.6±0.3<br>(8-13)<br>[29]   | 2.7±0.2<br>(1.0-6.0)<br>[65]   | 357.9±34.<br>6 (315.8-<br>428.6) [29]        | 4663.4±201.<br>7 (4265.6-<br>5015.6) [29]        | 17.0±2.1<br>(13.0-23.0)<br>[30]  | 5.4±0.3<br>(5-7)<br>[30]  | 3.2±0.5<br>(1.0-9.0)<br>[54]       | 327.7±60.0<br>(222.2-500)<br>[30]    | 4496.7±197.<br>8 (4171.9-<br>4968.8) [30]        | 4.7±0.7<br>(3.8-6.2)<br>[25]  | 2.8±0.9<br>(2-10)<br>[28] | Dendrop_nanusBelaVistaMS3bTRC_AAAGmt<br>Dendrop_nanusBelaVistaMS1aTRC_AAAGmt<br>Dendrop_nanusBelaVistaMS2aTRC_AAAGmt<br>FNJV 0044906<br>FNJV 0044907                                                                                                                                                                                                                                                                                                  |
|   | Piraputanga – MS<br>(N = 10)  | 37.6±5.5<br>(29-45)<br>[50]         | 11.58±1.4<br>(10-14)<br>[50] | 3.4±0.1<br>(3.2-3.5)<br>[09]   | 297.17±9.<br>9<br>(288.7-<br>308.1)<br>[09]  | 4502.16±156<br>.9<br>(4246.3-<br>4720.1)<br>[50] | 16.9±1.8<br>(13-20)<br>[50]      | 4.76±0.6<br>(4-5)<br>[50] | 3.6±1.1<br>(2.8-4.9)<br>[09]       | 325.71±96.0<br>(222.8-412.7)<br>[09] | 4501.29±137<br>.2<br>(4255.0-<br>4711.5)<br>[50] | 6.8±1.4<br>(5.6-8.3)<br>[09]  | 2.9±0.8<br>(2-5)<br>[40]  | FNJV 0044059 - 68                                                                                                                                                                                                                                                                                                                                                                                                                                     |
|   | Cachoeirão – MS<br>(N = 10)   | 33.9±5.3<br>(24-42)<br>[50]         | 11.04±1.6<br>(8-14)<br>[50]  | 3.2±0.1<br>(3.1-3.3)<br>[09]   | 311.82±7.<br>3<br>(305.3-<br>319.6)<br>[09]  | 4671.84±164<br>.2<br>(4384.2-<br>4892.4)<br>[50] | 15.1±2.6<br>(11-20)<br>[50]      | 4.36±1.2<br>(2-7)<br>[50] | 3.5±0.4<br>(3.2-3.9)<br>[09]       | 286.97±29.3<br>(255.6-313.7)<br>[09] | 4660.64±162<br>.8<br>(4418.6-<br>4935.4)<br>[50] | 7.0±1.1<br>(6.2-8.2)<br>[09]  | 5.1±3.1<br>(2-11)<br>[40] | FNJV0044069 - 78                                                                                                                                                                                                                                                                                                                                                                                                                                      |
|   | C. Grande – MS<br>(N = 2)     | 34.7±8.3<br>(29-41)<br>[06]         | 10.60±1.1<br>(10-11)<br>[06] | 3.5±0.1<br>(3.4-3.6)<br>[06]   | 288.53±8.<br>7<br>(282.4-<br>294.7)<br>[06]  | 4345.39±6.1<br>(4341.1-<br>4349.7)<br>[06]       | 15.4±1.4<br>(14-16)<br>[06]      | 4.40±0.6<br>(4-5)<br>[06] | 3.9±0.1<br>(3.8-4.0)<br>[06]       | 295.73±50.6<br>(259.9-331.5)<br>[06] | 4306.61±24.<br>4<br>(4289.4-<br>4323.8)<br>[06]  | 6.9±0.05<br>(6.8-6.9)<br>[06] | 2±0<br>(2)<br>[08]        | FNJV 0044904<br>FNJV 0044905                                                                                                                                                                                                                                                                                                                                                                                                                          |

|  |                                 |                             |                              |                              |                                              |                                                  |                             |                           |                              |                                      |                                                  |                              |                            |                                                              |
|--|---------------------------------|-----------------------------|------------------------------|------------------------------|----------------------------------------------|--------------------------------------------------|-----------------------------|---------------------------|------------------------------|--------------------------------------|--------------------------------------------------|------------------------------|----------------------------|--------------------------------------------------------------|
|  | <b>P. Murtinho – MS (N = 1)</b> | 32.4±0<br>(32)<br>[05]      | 10.20±0<br>(10)<br>[05]      | 3.2±0<br>(3.2)<br>[05]       | 315.00±0<br>(315.0)<br>[05]                  | 4593.80±0.0<br>(4593.8)<br>[05]                  | 13.0±0<br>(13)<br>[05]      | 4.40±0<br>(4)<br>[05]     | 2.9±0<br>(2.9)<br>[05]       | 339.42±0<br>(339.42)<br>[05]         | 4565.66±0<br>(4565.66)<br>[05]                   | 3.6±0<br>(3.6)<br>[03]       | 2±0<br>(2)<br>[03]         | Dendropsophus nanus - Porto Murtinho                         |
|  | <b>S. Pedro – PR (N = 4)</b>    | 47.8±4.9<br>(45-55)<br>[20] | 13.30±1.7<br>(11-15)<br>[20] | 3.6±0.5<br>(3.2-4.2)<br>[20] | 279.87±29<br>.8<br>(244.7-<br>315.7)<br>[20] | 3899.64±190<br>.9<br>(3660.6-<br>4074.1)<br>[20] | 23.4±5.3<br>(18-30)<br>[20] | 4.80±1.0<br>(3-6)<br>[20] | 5.4±2.0<br>(3.7-8.1)<br>[20] | 214.48±70.8<br>(133.3-277.2)<br>[20] | 3921.18±173<br>.3<br>(3720.9-<br>4082.7)<br>[20] | 4.9±1<br>(3.6-5.8)<br>[12]   | 12.8±6.3<br>(4-20)<br>[12] | FNJV 0044908<br>FNJV 0044909<br>FNJV 0044910<br>FNJV 0044911 |
|  | <b>Fênix – PR (N = 2)</b>       | 46.5±0.7<br>(46-47)<br>[10] | 13.90±1.3<br>(13-15)<br>[10] | 3.4±0.2<br>(3.2-3.5)<br>[10] | 299.67±22<br>.5<br>(283.8-<br>315.6)<br>[10] | 4160.20±60.<br>9<br>(4117.1-<br>4203.3)<br>[10]  | 23.3±4.4<br>(20-26)<br>[10] | 5.90±1.0<br>(5-7)<br>[10] | 4.0±0.1<br>(3.9-4.1)<br>[10] | 252.86±2.3<br>(251.2-254.5)<br>[10]  | 4134.36±60.<br>9<br>(4091.3-<br>4177.4)<br>[10]  | 6.2±0.1<br>(6.1-6.3)<br>[06] | 5.7±4.7<br>(2-9)<br>[06]   | FNJV 0044912<br>FNJV 0044913                                 |

| Lineage  | Localities                           | Note duration               | Number of pulses          | Pulse duration          | Pulse rate                          | Peak frequency                     | Call group rate                | Notes per sequence        | Internote interval in sequence (s) | Call label inMBC collection                                                                                                                                                                                                                                                                                                                                                                         |
|----------|--------------------------------------|-----------------------------|---------------------------|-------------------------|-------------------------------------|------------------------------------|--------------------------------|---------------------------|------------------------------------|-----------------------------------------------------------------------------------------------------------------------------------------------------------------------------------------------------------------------------------------------------------------------------------------------------------------------------------------------------------------------------------------------------|
| <b>D</b> | <b>Costa Marques – RO ** (N = 9)</b> | 15.5±2.7<br>(8-30)<br>[140] | 4.6±1.6<br>(1-9)<br>[140] | 4.2±1.8 (1-20)<br>[253] | 293.4±88.1<br>(50-461.5)<br>[140]   | 4426±211.9<br>(4078-4734)<br>[140] | 4.5±0.5<br>(2.82-6.29)<br>[30] | 6.3±3.8<br>(2-26)<br>[65] | 0.22±0.03<br>(0.155-0.328)<br>[69] | Dendrop_walfordiCostaMarquesRO1aAAGm671<br>Dendrop_walfordiCostaMarquesRO4aAAGm671<br>Dendrop_walfordiCostaMarquesRO5dAAGm671<br>Dendrop_walfordiCostaMarquesRO6cAAGm671<br>Dendrop_walfordiCostaMarquesRO9aAAGm671<br>Dendrop_walfordiCostaMarquesRO11aAAGm671<br>Dendrop_walfordiCostaMarquesRO12aAAGm671<br>Dendrop_walfordiCostaMarquesRO13bAAGm671<br>Dendrop_walfordiCostaMarquesRO14dAAGm671 |
|          | <b>Balém – PA (N = 7)</b>            | 13.6±1.7<br>(6-23)<br>[116] | 4.0±0.8<br>(2-9)<br>[116] | 3.7±1.1 (1-12)<br>[203] | 308.0±108.4<br>(166.7-800)<br>[116] | 4666±290.3<br>(4321-5343)<br>[116] | 4.1±0.4<br>(2.9-4.8)<br>[28]   | 2.9±0.52<br>(2-7)<br>[66] | 0.23±0.04<br>(0.193-0.346)<br>[55] | Dendrop_cf_nanusBelemPA1aBFVT_AAGmt<br>Dendrop_cf_nanusBelemPA2aBFVT_AAGmt<br>Dendrop_cf_nanusBelemPA3aBFVT_AAGmt<br>Dendrop_cf_nanusBelemPA4aBFVT_AAGmt<br>Dendrop_cf_nanusBelemPA1bLBM_AAGmt<br>Dendrop_cf_nanusBelemPA2aLBM_AAGmt<br>Dendrop_cf_nanusBelemPA3bLBM_AAGmt                                                                                                                          |
|          | <b>Cruzeiro do sul – RO (N = 3)</b>  | 14.8±2<br>(9-24)<br>[36]    | 3.6±0.4<br>(2-6)<br>[37]  | 4.2±0.9 (2-15)<br>[97]  | 250.1±71.9<br>(136.4-384.6)<br>[36] | 4371±121.7<br>(4220-4608)<br>[36]  | 3.7±0.1<br>(3.4-3.8)<br>[11]   | 3.9±0.9<br>(2-9)<br>[25]  | 0.25±0.01<br>(0.219-0.272)<br>[19] | Dendrop_walfordiCruzeiroDoSulAC1aBFVT_AAGm<br>Dendrop_walfordiCruzeiroDoSulAC2aBFVT_AAGm<br>Dendrop_walfordiCruzeiroDoSulAC3aBFVT_AAGm                                                                                                                                                                                                                                                              |
|          | <b>Feijó – RO (N = 1)</b>            | 13.2±0.0<br>(10-16) [13]    | 4.2±0.0<br>(3-5)<br>[13]  | 2.9±0.0 (1-7)<br>[35]   | 333.4±0.0<br>(187.5-500.0)<br>[13]  | 4459±0.0<br>(4435-4522)<br>[13]    | 4.1±0.0<br>(3.9-4.4)<br>[4]    | 9.8±0.0<br>(2-35)<br>[5]  | 0.23±0.0<br>(0.22-0.26)<br>[11]    | Dendrop_walfordiFeijoAC1aBFVT_AAGm                                                                                                                                                                                                                                                                                                                                                                  |

|  |                                                                              |                          |                           |                        |                                    |                                   |                               |                           |                                    |                                                                                                                                                                      |
|--|------------------------------------------------------------------------------|--------------------------|---------------------------|------------------------|------------------------------------|-----------------------------------|-------------------------------|---------------------------|------------------------------------|----------------------------------------------------------------------------------------------------------------------------------------------------------------------|
|  | Itapua<br>do Oeste<br>– RO<br>(N =3)<br><br>Rio<br>Branco –<br>AC<br>(N = 4) | 16.1±3.9<br>(10-23) [40] | 3.0±0.59<br>(1-5)<br>[40] | 5.4±1.5 (2-17)<br>[89] | 194.5±52.7<br>(58.8-363.6)<br>[40] | 4390±75.4 (4177-<br>4478) [40]    | 4.3±0.4<br>(2.7-4.8)<br>[8]   | 4.0±1.5<br>(2-14)<br>[18] | 0.21±0.02<br>(0.174-0.355)<br>[23] | Dendrop_walfordiItapuaDoesteRO2aBFVT_AAGm<br>Dendrop_walfordiItapuaDoesteRO4aBFVT_AAGm<br>Dendrop_walfordiItapuaDoesteRO5aBFVT_AAGm                                  |
|  |                                                                              | 12.8±2.6 (6-<br>23) [51] | 3.19±0.46 (1-5)<br>[51]   | 4.1±12 (2-11)<br>[111] | 269.5±84.9<br>(62.5-425.6)<br>[51] | 4526±128.6<br>(4177-4694)<br>[51] | 3.9±0.23<br>(3.5-4.3)<br>[11] | 7.3±5.5<br>(2-24)<br>[18] | 0.24±0.02<br>(0.194-0.274)<br>[30] | Dendrop_walfordiRioBrancoAC2aBFVT_AAGm<br>Dendrop_walfordiRioBrancoAC3aBFVT_AAGm<br>Dendrop_walfordiRioBrancoAC4aBFVT_AAGm<br>Dendrop_walfordiRioBrancoAC5aBFVT_AAGm |
