# Supplementary material
Source: MDPI journal article supplement (https://www.mdpi.com/1424-2818/13/11/522)
Supplement: s1 [file s1]

**Table S4.** Uncorrected p-distances (%) estimated from the 16Sar-16Sbr fragment between the lineages of *D. nanus* – *D. walfordi* species complex recognized in this work (Lineages A–E) and the *Dendropsophus* species analyzed by Guarnizo et al. (2012). Uncorrected p-distances identified within each species or lineage are also indicated (diagonal gray line).

|                        | 1          | 2          | 3          | 4          | 5    | 6          | 7          | 8 |
|------------------------|------------|------------|------------|------------|------|------------|------------|---|
| <b>1 Lineage A</b>     | 0.4        |            |            |            |      |            |            |   |
| <b>2 Lineage B</b>     | <b>1.0</b> | 0.2        |            |            |      |            |            |   |
| <b>3 Lineage C</b>     | <b>1.3</b> | <b>1.8</b> | 0.2        |            |      |            |            |   |
| <b>4 Lineage D</b>     | <b>1.9</b> | <b>1.9</b> | <b>1.8</b> | 0.6        |      |            |            |   |
| <b>5 Lineage E</b>     | <b>1.4</b> | <b>1.5</b> | <b>1.3</b> | <b>1.1</b> | 0.0  |            |            |   |
| 6 <i>D. labialis</i>   | 12.3       | 12.3       | 12.0       | 11.9       | 11.7 | #          |            |   |
| 7 <i>D. ludekei</i>    | 12.7       | 12.6       | 12.3       | 12.2       | 11.9 | <b>2.5</b> | #          |   |
| 8 <i>D. meridensis</i> | 12.1       | 12.1       | 11.7       | 11.6       | 11.4 | <b>1.3</b> | <b>1.8</b> | # |
