# Supplementary material
Source: MDPI journal article supplement (https://www.mdpi.com/1424-2818/13/11/522)
Supplement: s1 [file s1]

**Table S3.** Morphometric values (mean  $\pm$  standard deviation) obtained from 37 specimens of Lineages A, B, C and E, including the topotype of *D. nanus* (\*), and 34 specimens of Lineage D, including the topotype of *D. walfordi* (\*\*). N: Number of sampled individuals. SVL: snout–vent length. HL: head length. HW: head width. TD: tympanum diameter. ED: eye diameter. SL: shank length (= tibia length). FL: foot length. TL: thigh length. HAL: hand length. END: eye–nostril distance.

|     | Lineage A                      | Lineage B                     |                               |                                   | Lineage C                     |                               | Lineage E                     |                            |
|-----|--------------------------------|-------------------------------|-------------------------------|-----------------------------------|-------------------------------|-------------------------------|-------------------------------|----------------------------|
|     | Cuiabá – MT<br>(N = 10)        | Araguari – MG<br>(N = 5)      | Carolina – MA<br>(N = 5)      | Guarani de<br>Goiás - GO<br>(N=1) | Vilhena – RO<br>(N = 3)       | Cáceres – MT<br>(N = 3)       | Resistencia - AR*<br>(N = 9)  | Bela Vista - MS<br>(N = 1) |
| SVL | 17.9 $\pm$ 1.0<br>(16.8-19.45) | 20.7 $\pm$ 0.6<br>(19.9-21.6) | 19.3 $\pm$ 1.3<br>(17.3-20.2) | 19.2                              | 20.1 $\pm$ 1.1<br>(18.5-21.0) | 20.0 $\pm$ 0.6<br>(19.3-20.7) | 18.6 $\pm$ 0.6<br>(17.6-19.7) | 17.5                       |
| HW  | 5.5 $\pm$ 0.6<br>(4.8-6.5)     | 6.1 $\pm$ 0.1<br>(6.0-6.3)    | 5.9 $\pm$ 0.2<br>(5.6-6.1)    | 5.7                               | 6.0 $\pm$ 0.5<br>(5.3-6.3)    | 5.9 $\pm$ 0.3<br>(5.6-6.2)    | 5.8 $\pm$ 0.2<br>(5.5-6.2)    | 5.5                        |
| HL  | 5.7 $\pm$ 1.2<br>(4.6-7.5)     | 6.2 $\pm$ 0.3<br>(5.9-6.7)    | 6.0 $\pm$ 0.4<br>(5.5-6.5)    | 6.5                               | 6.2 $\pm$ 0.1<br>(6.0-6.3)    | 6.3 $\pm$ 0.4<br>(5.8-6.8)    | 5.4 $\pm$ 0.2<br>(5.1-5.8)    | 6.1                        |
| ED  | 2.0 $\pm$ 0.3<br>(1.7-2.4)     | 2.2 $\pm$ 0.1<br>(2.2-2.4)    | 2.1 $\pm$ 0.1<br>(1.9-2.2)    | 2.0                               | 2.1 $\pm$ 0.1<br>(2.1-2.2)    | 2.1 $\pm$ 0.2<br>(1.9-2.3)    | 2.0 $\pm$ 0.1<br>(1.8-2.2)    | 2.1                        |
| TD  | 0.8 $\pm$ 0.1<br>(0.6-0.9)     | 0.8 $\pm$ 0.1<br>(0.6-0.8)    | 0.7 $\pm$ 0.1<br>(0.6-0.9)    | 0.6                               | 1.0 $\pm$ 0.1<br>(0.9-1.0)    | 0.8 $\pm$ 0.1<br>(0.7-0.8)    | 0.8 $\pm$ 0.1<br>(0.7-1.0)    | 0.9                        |
| END | 1.4 $\pm$ 0.3<br>(1.1-2.0)     | 1.64 $\pm$ 0.1<br>(1.6-1.7)   | 1.6 $\pm$ 0.1<br>(1.5-1.8)    | 1.5                               | 1.6 $\pm$ 0.2<br>(1.3-1.8)    | 1.7 $\pm$ 0.1<br>(1.6-1.8)    | 1.6 $\pm$ 0.1<br>(1.5-1.6)    | 1.3                        |
| HAL | 5.3 $\pm$ 0.6<br>(4.4-6.0)     | 5.9 $\pm$ 0.2<br>(5.7-6.3)    | 5.8 $\pm$ 0.3<br>(5.2-6.1)    | 5.2                               | 6.1 $\pm$ 0.6<br>(5.3-6.6)    | 6.1 $\pm$ 0.5<br>(5.6-6.7)    | 5.4 $\pm$ 0.2<br>(5.3-5.7)    | 4.9                        |
| FL  | 8.0 $\pm$ 0.8<br>(7.0-9.4)     | 9.2 $\pm$ 0.3<br>(8.9-9.5)    | 8.6 $\pm$ 0.5<br>(7.7-9.3)    | 8.3                               | 9.0 $\pm$ 0.7<br>(8.0-9.6)    | 9.0 $\pm$ 0.8<br>(7.8-9.6)    | 8.2 $\pm$ 0.2<br>(7.8-8.5)    | 7.6                        |
| TL  | 8.9 $\pm$ 1.0<br>(7.4-10.0)    | 10.1 $\pm$ 0.2<br>(10.0-10.4) | 9.4 $\pm$ 0.3<br>(8.9-9.8)    | 9.7                               | 10.0 $\pm$ 0.3<br>(9.7-10.5)  | 9.9 $\pm$ 0.8<br>(9.1-10.8)   | 9.7 $\pm$ 0.5<br>(9.1-10.5)   | 9.0                        |
| SL  | 8.9 $\pm$ 0.8<br>(7.58-10.1)   | 10.2 $\pm$ 0.3<br>(9.8-10.5)  | 9.7 $\pm$ 0.3<br>(9.0-9.9)    | 9.8                               | 9.8 $\pm$ 0.4<br>(9.2-10.1)   | 10.3 $\pm$ 0.8<br>(9.2-10.7)  | 9.5 $\pm$ 0.5<br>(8.6-10.2)   | 9.3                        |

| Lineage D |                                   |                         |                                 |                            |
|-----------|-----------------------------------|-------------------------|---------------------------------|----------------------------|
|           | Costa Marques – RO **<br>(N = 20) | Belém – PA<br>(N = 4)   | Itapuã do Oeste – RO<br>(N = 5) | Rio Branco – AC<br>(N = 5) |
| SVL       | 19.8±0.6<br>(19.0-20.9)           | 16.6±0.4<br>(16.3-17.1) | 17.1±0.5<br>(16.3-17.8)         | 17.1±0.5<br>(16.3-17.8)    |
| HW        | 5.8±0.4<br>(5.4-7.0)              | 5.3±0.2<br>(5.2-5.6)    | 6.1±0.4<br>(5.4-6.6)            | 5.5±0.2<br>(5.1-5.8)       |
| HL        | 5.2±0.3<br>(4.7-5.9)              | 5.2±0.4<br>(4.8-5.8)    | 5.8±0.2<br>(5.6-6.1)            | 5.0±0.0<br>(5.0-5.1)       |
| ED        | 2.0±0.1<br>(1.8-2.2)              | 1.9±0.0<br>(1.8-1.9)    | 2.3±0.1<br>(2.2-2.4)            | 1.9±0.1<br>(1.8-2.0)       |
| TD        | 0.9±0.1<br>(0.7-1.1)              | 0.8±0.2<br>(0.6-1.1)    | 1.0±0.2<br>(0.7-1.3)            | 0.9±0.1<br>(0.7-1.0)       |
| END       | 1.5±0.2<br>(1.2-2.0)              | 1.5±0.1<br>(1.3-1.6)    | 1.7±0.1<br>(1.7-1.9)            | 1.5±0.2<br>(1.3-1.7)       |
| HAL       | 5.6±0.3<br>(5-6.6.0)              | 5.1±0.0<br>(5.1-5.1)    | 5.7±0.3<br>(5.2-6.0)            | 5.5±0.1<br>(5.3-5.7)       |
| FL        | 8.4±0.4<br>(7.9-9.5)              | 7.6±0.4<br>(7.1-8.0)    | 8.9±0.6<br>(8.1-10)             | 8.1±0.4<br>(7.6-8.7)       |
| TL        | 9.4±0.4<br>(8.8-10.4)             | 8.9±0.0<br>(8.8-8.9)    | 10.1±0.2<br>(9.9-10.5)          | 9.0±0.3<br>(8.5-9.3)       |
| SL        | 9.6±0.4<br>(8.9-10.5)             | 8.6±0.3<br>(8.2-9.0)    | 10.3±0.2<br>(10.1-10.5)         | 9.3±0.5<br>(8.7-9.8)       |
