# Supplementary material
Source: MDPI journal article supplement (https://www.mdpi.com/1424-2818/13/11/522)
Supplement: s1 [file s1]

Archive with 11 entries (11 files):
- Figure_S1.tif
- Figure_S2.tif
- Figure_S3.pdf
- Figure_S4.tif
- Figure_S5.tif
- Figure_S6.tif
- Figure_S7_svl.tif
- Table_S1_Samples-revised-jul_30-k-Fa.pdf
- Table_S2_Call_ago_2020-Bernardo-Fa.pdf
- Table_S3_revised_ago_2020.pdf
- Table_S4_ago_2020.pdf
