# Supplementary material
Source: MDPI journal article supplement (https://www.mdpi.com/1424-2818/13/11/522)

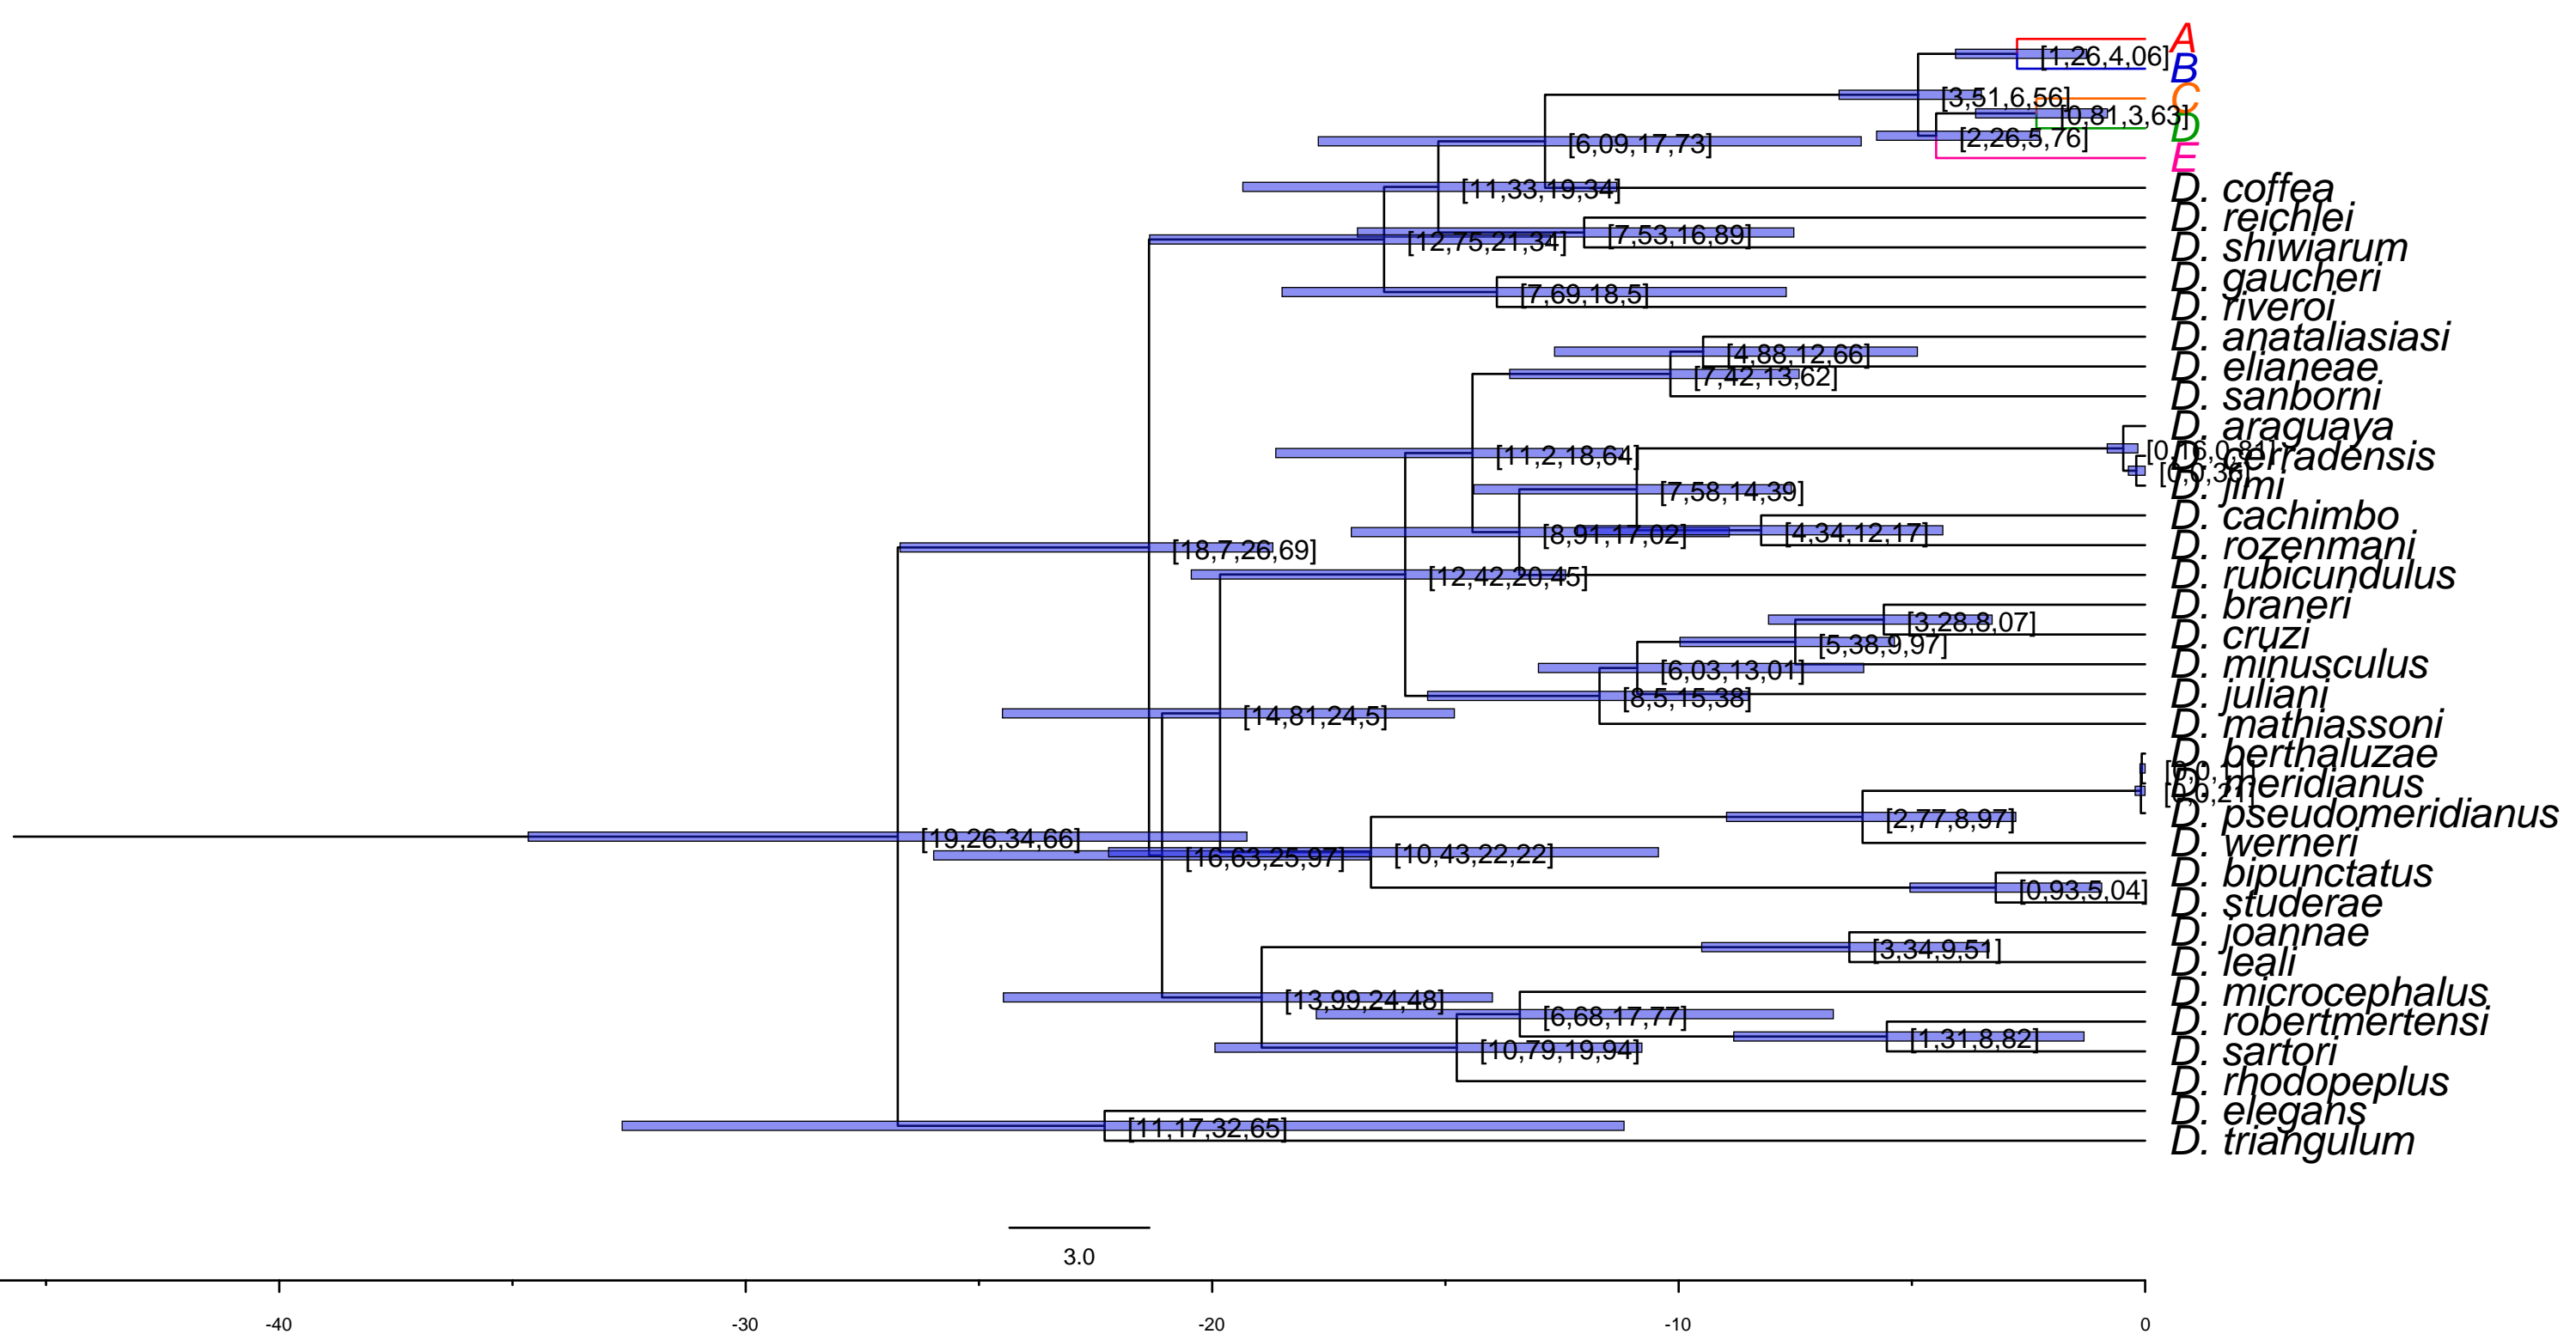

Supplement: s1 [file s1]

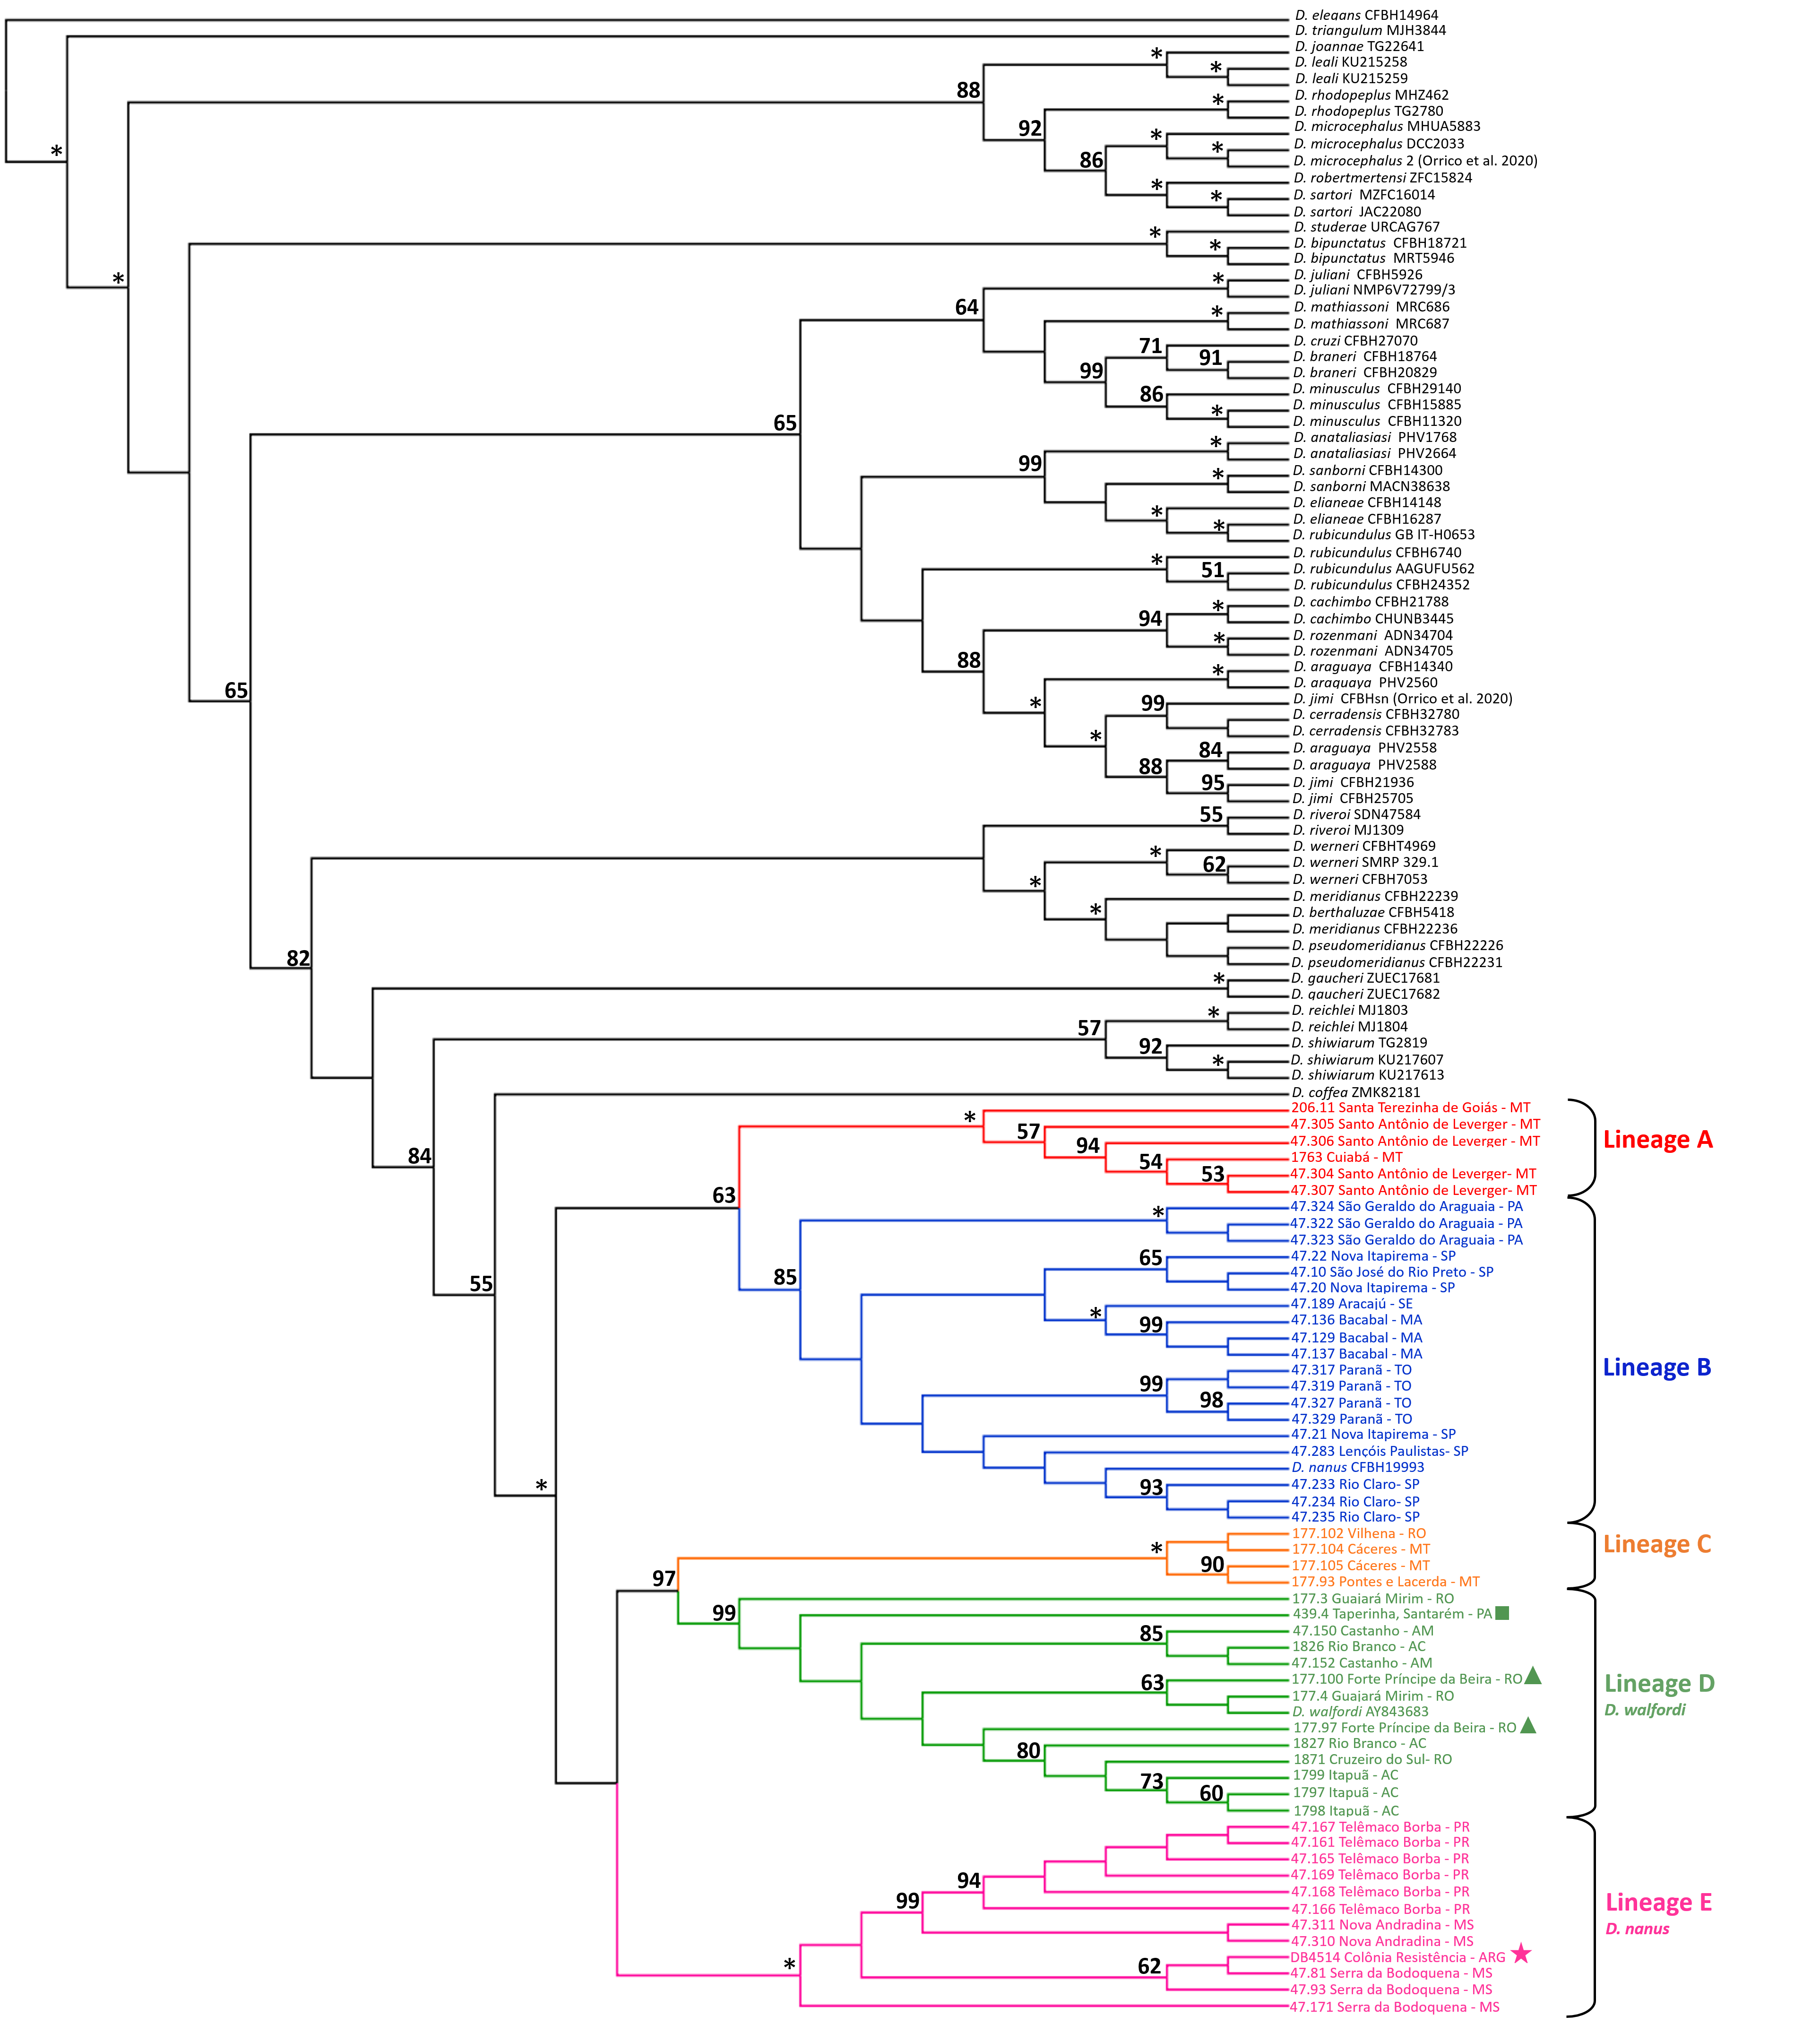

Supplement: s1 [file s1 › Figure_S1.tif]

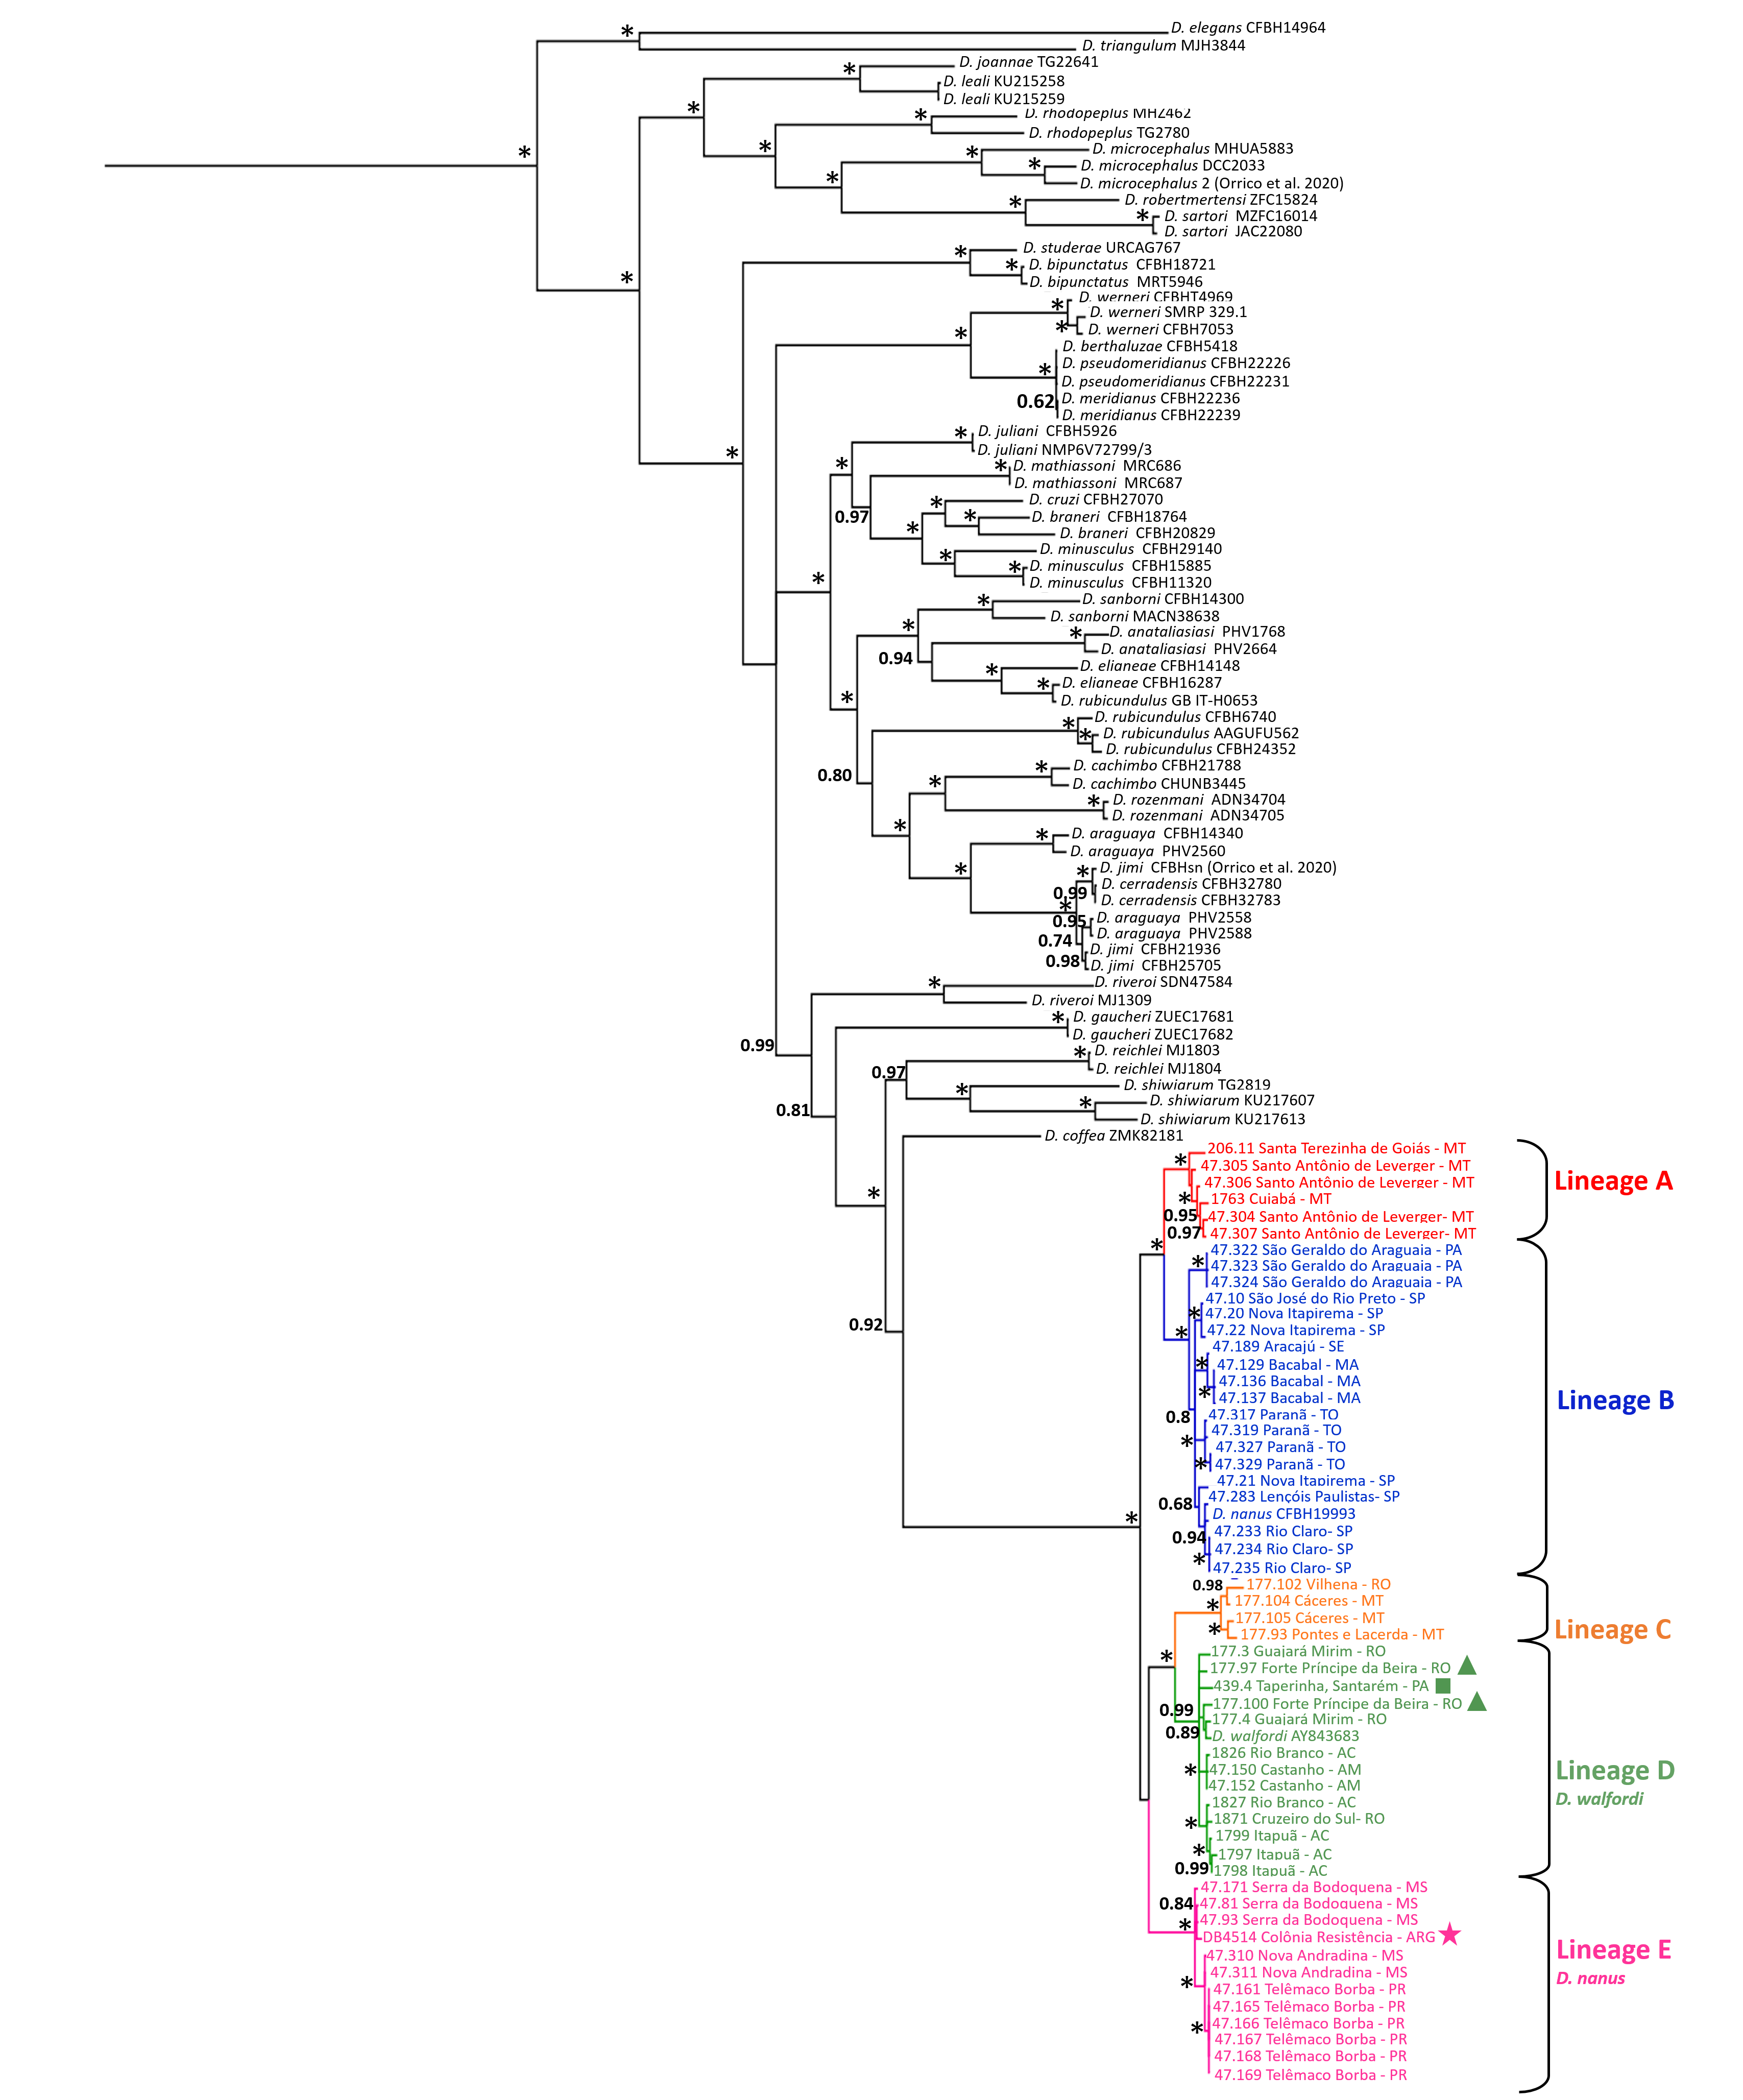

Supplement: s1 [file s1 › Figure_S2.tif]

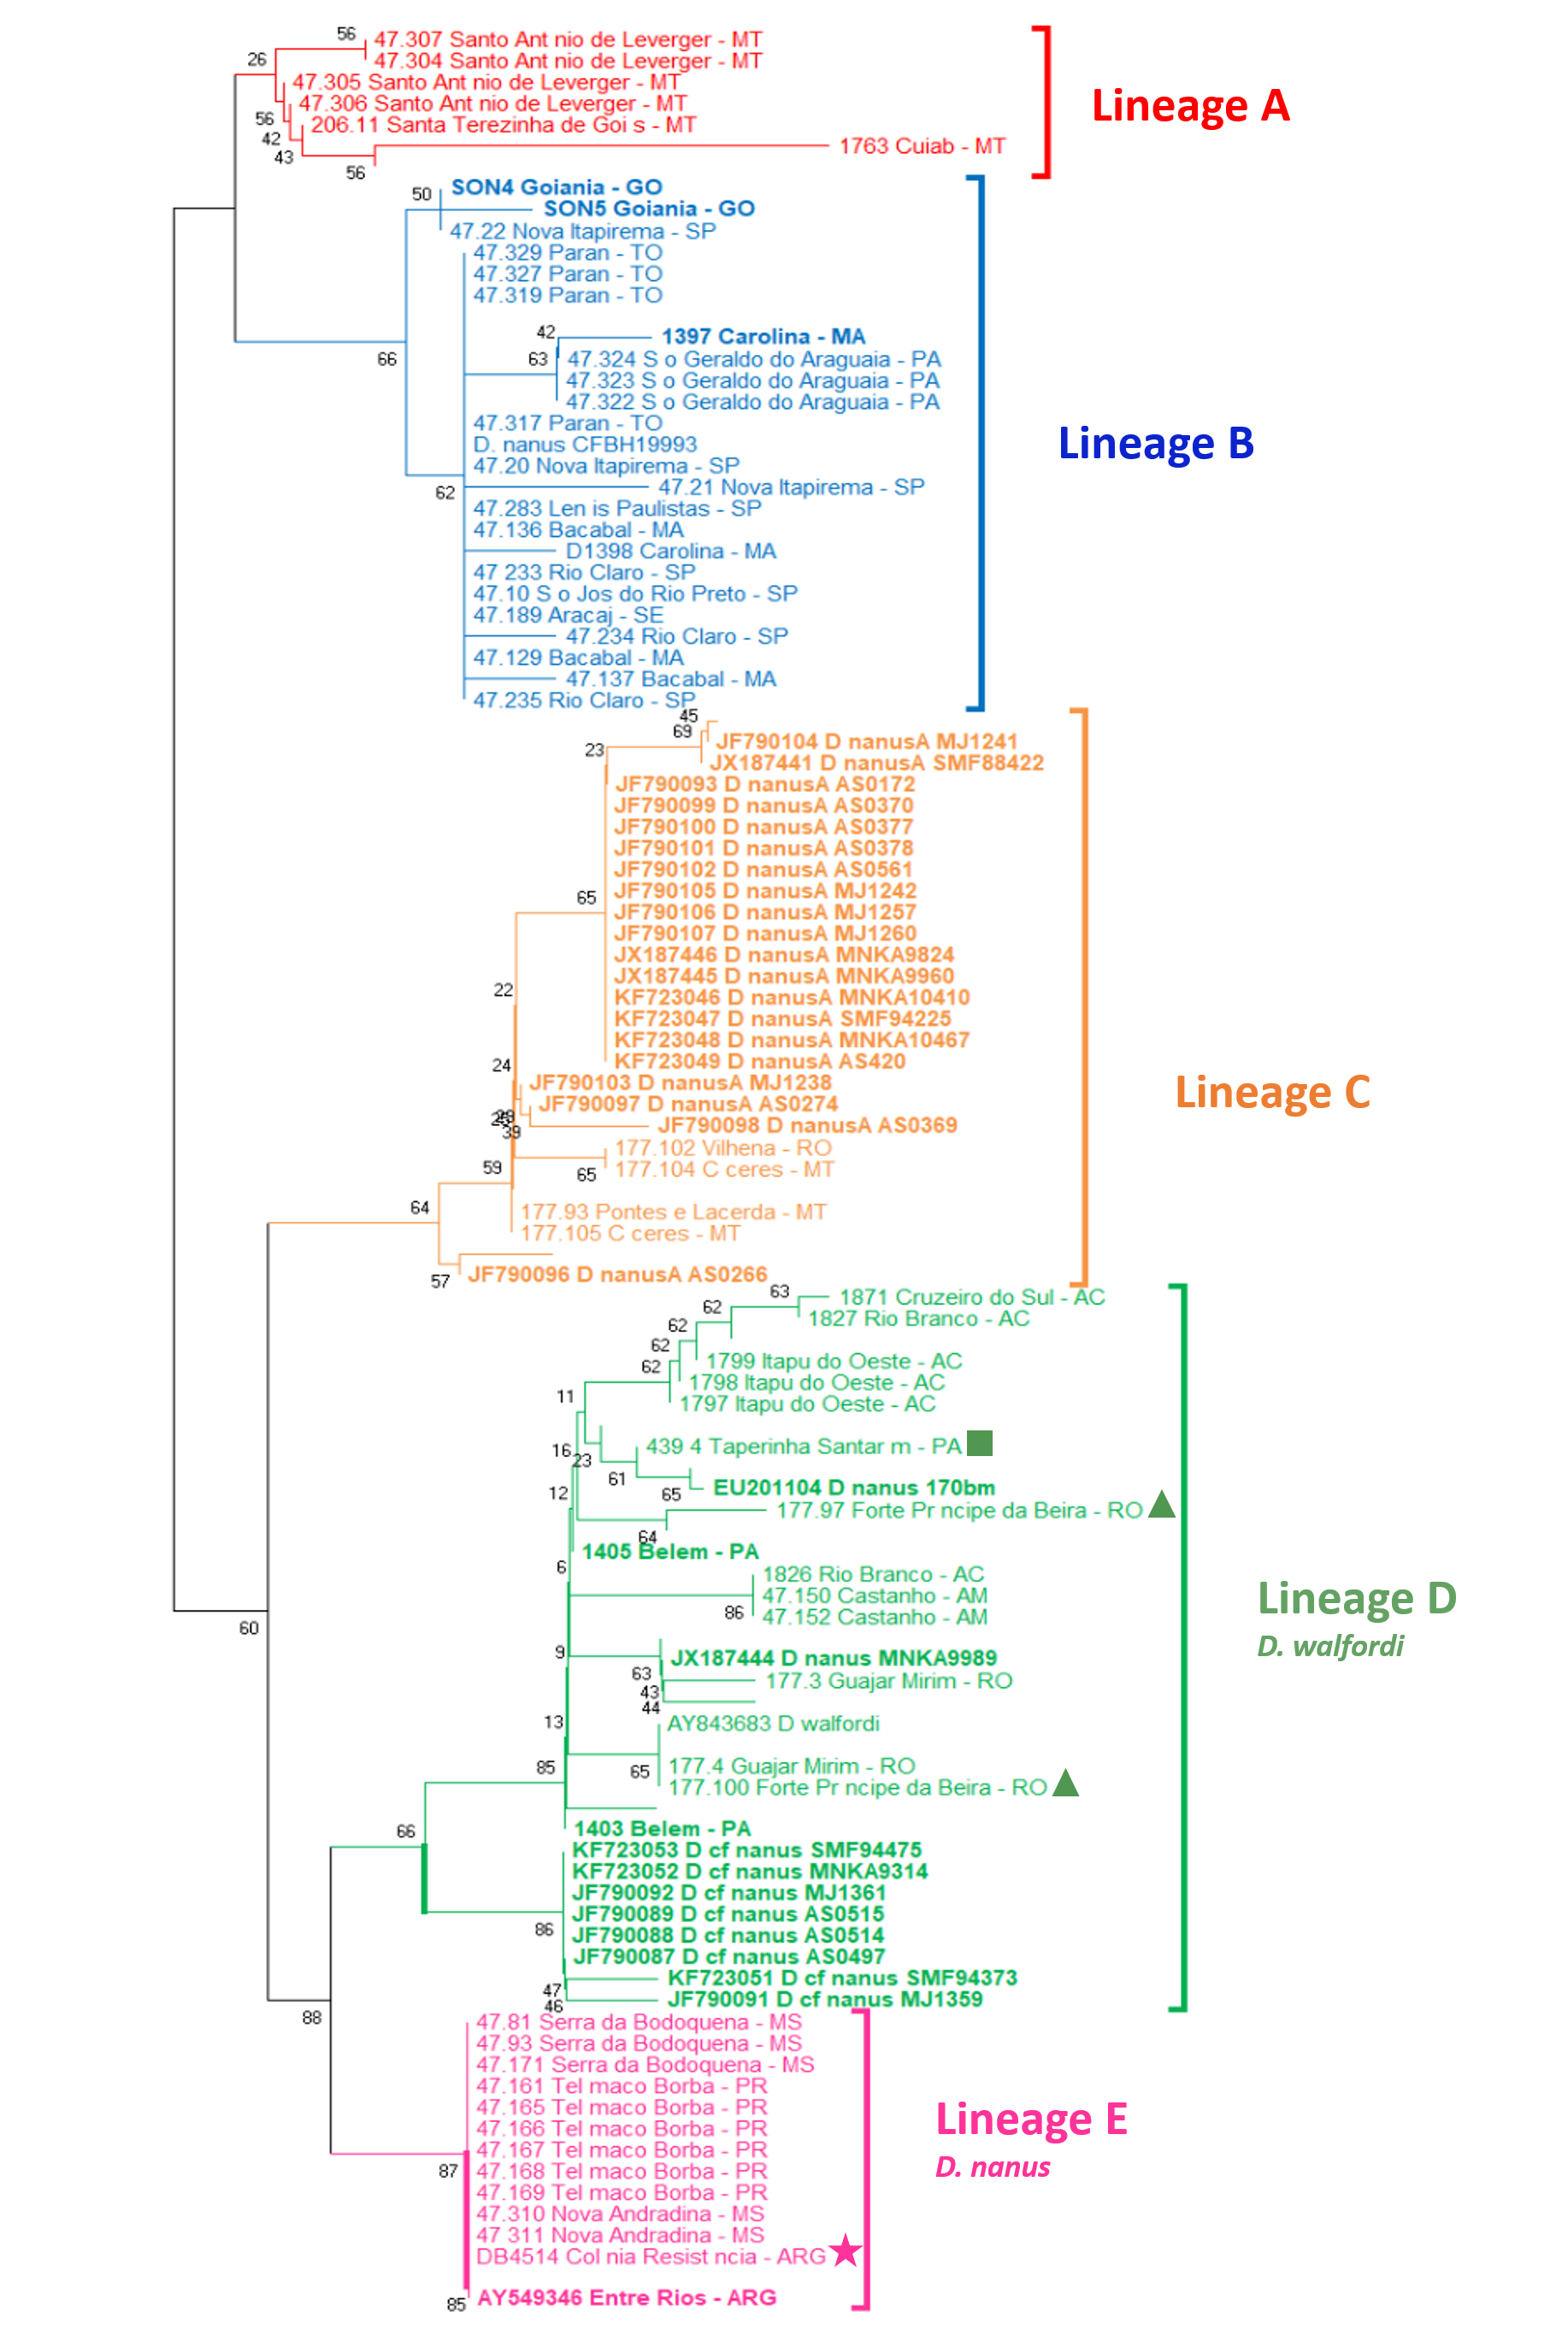

Supplement: s1 [file s1 › Figure_S4.tif]

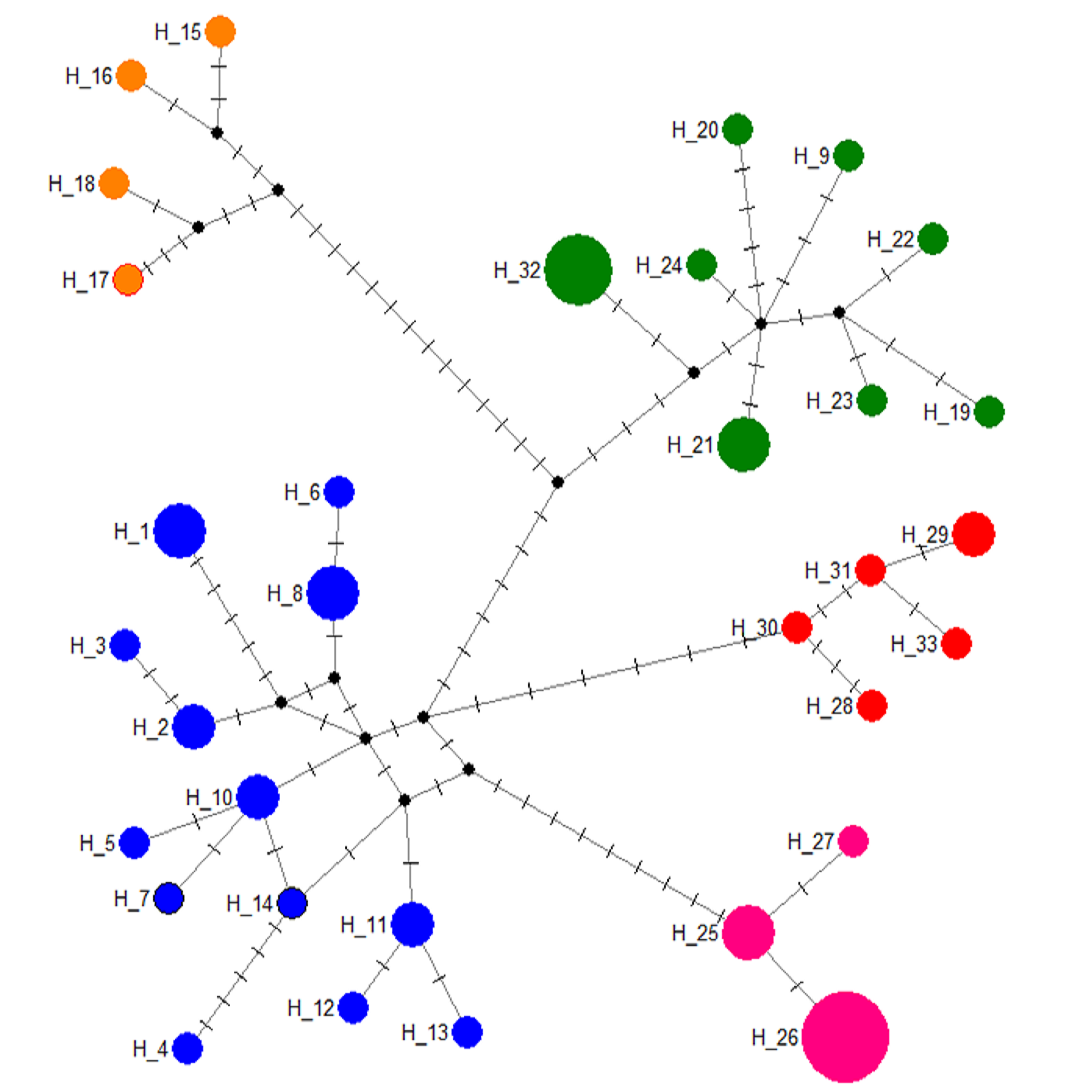

Supplement: s1 [file s1 › Figure_S5.tif]

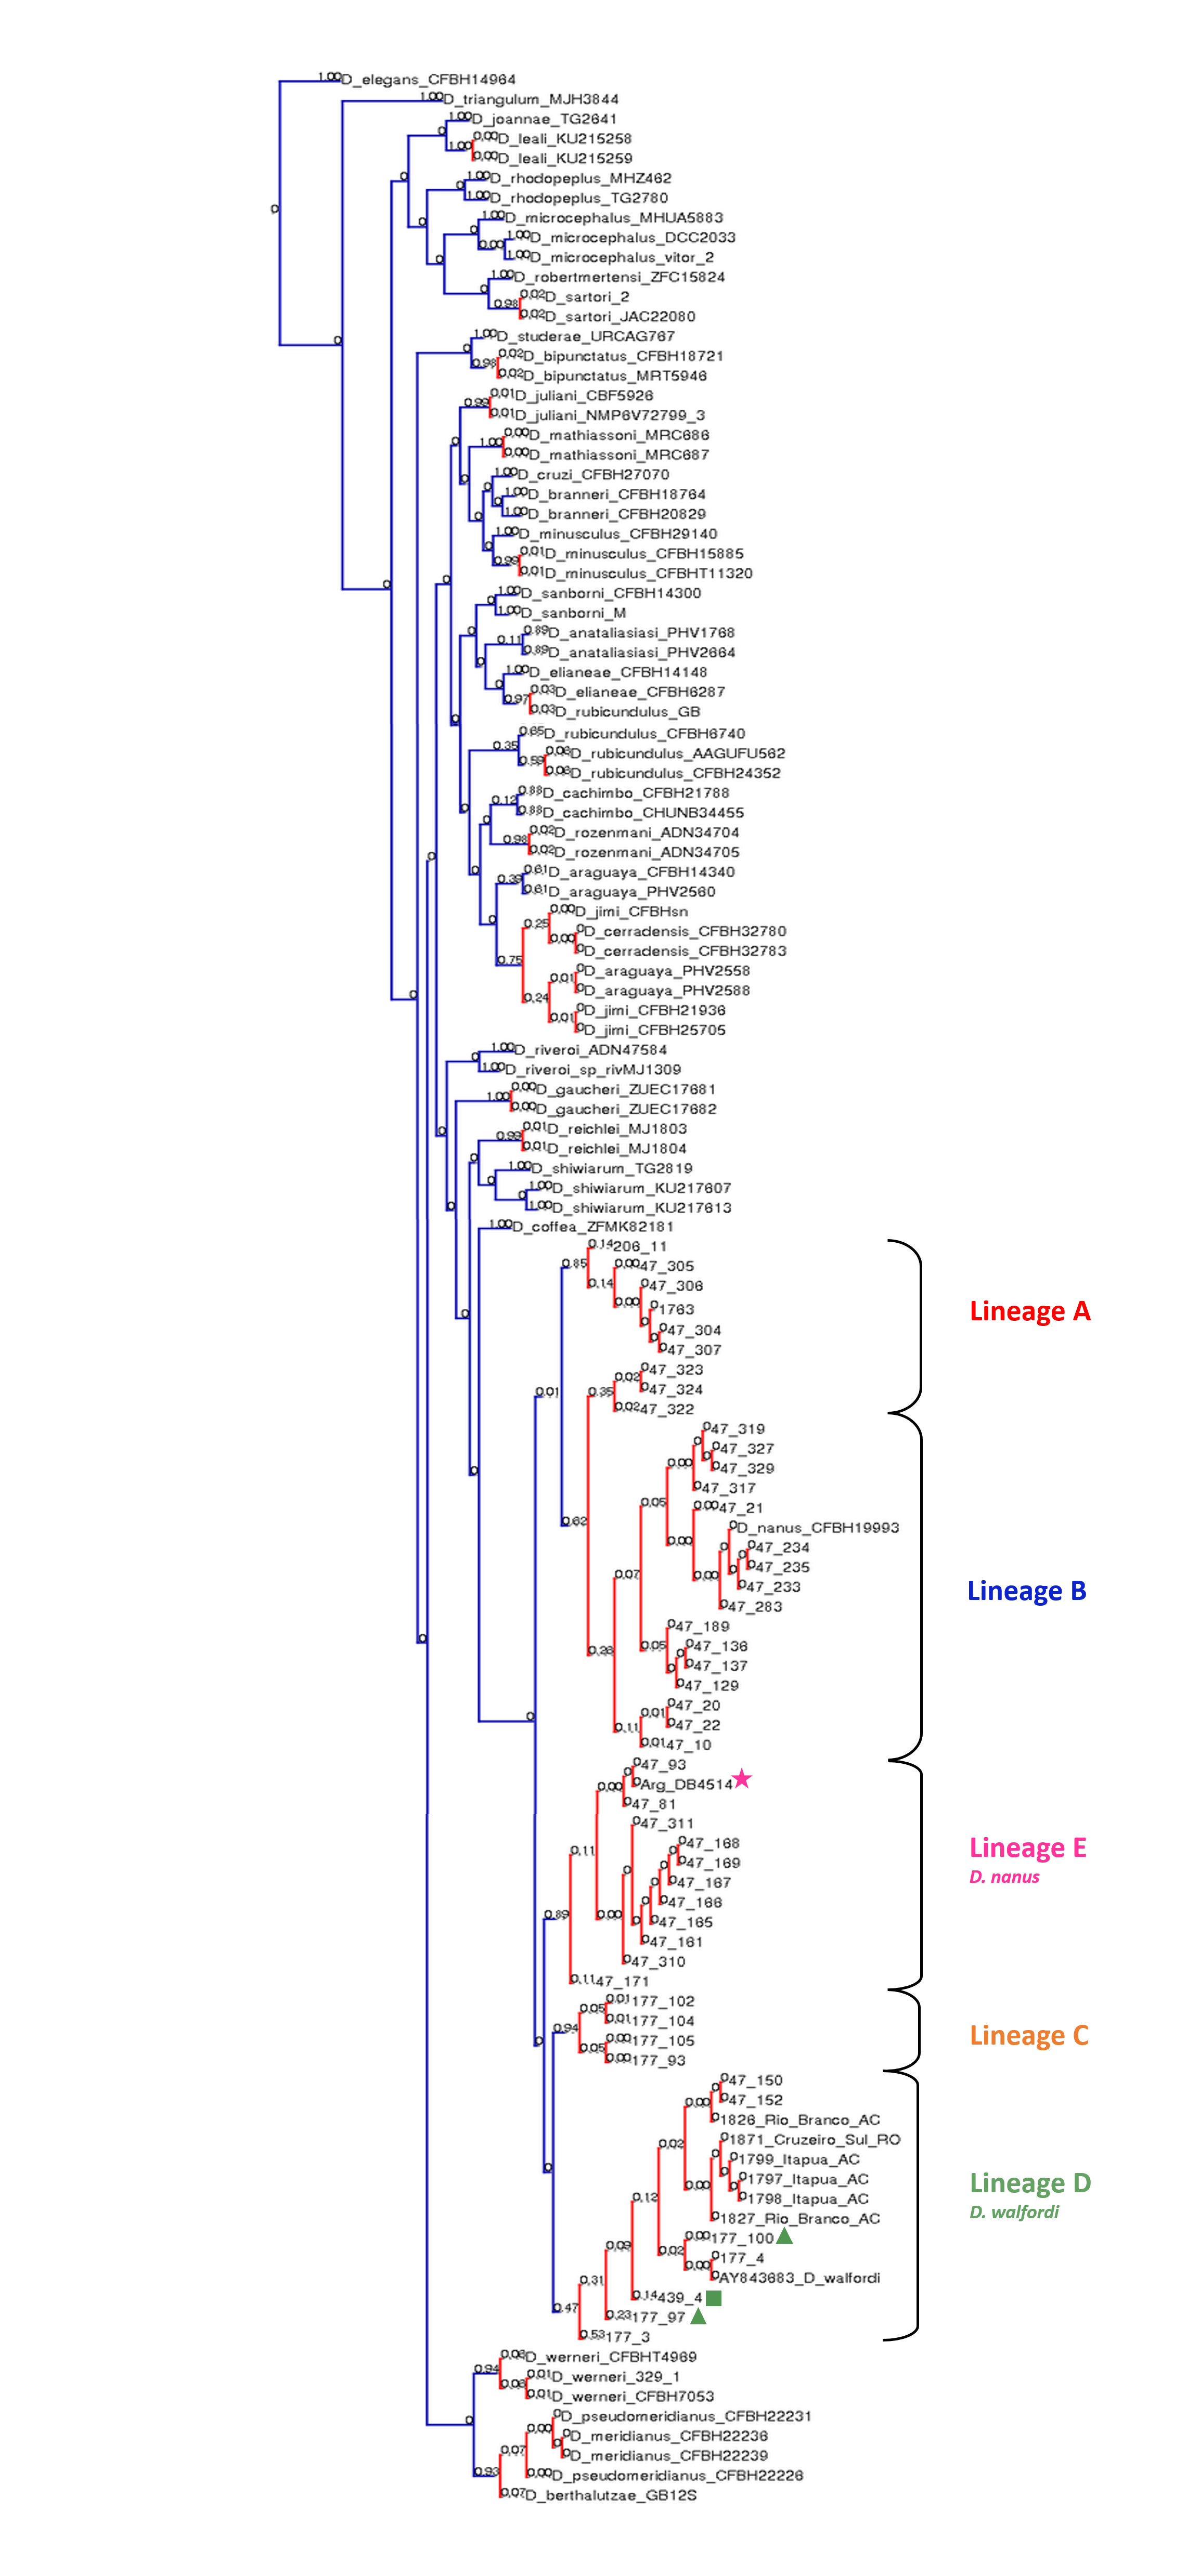

Supplement: s1 [file s1 › Figure_S6.tif]

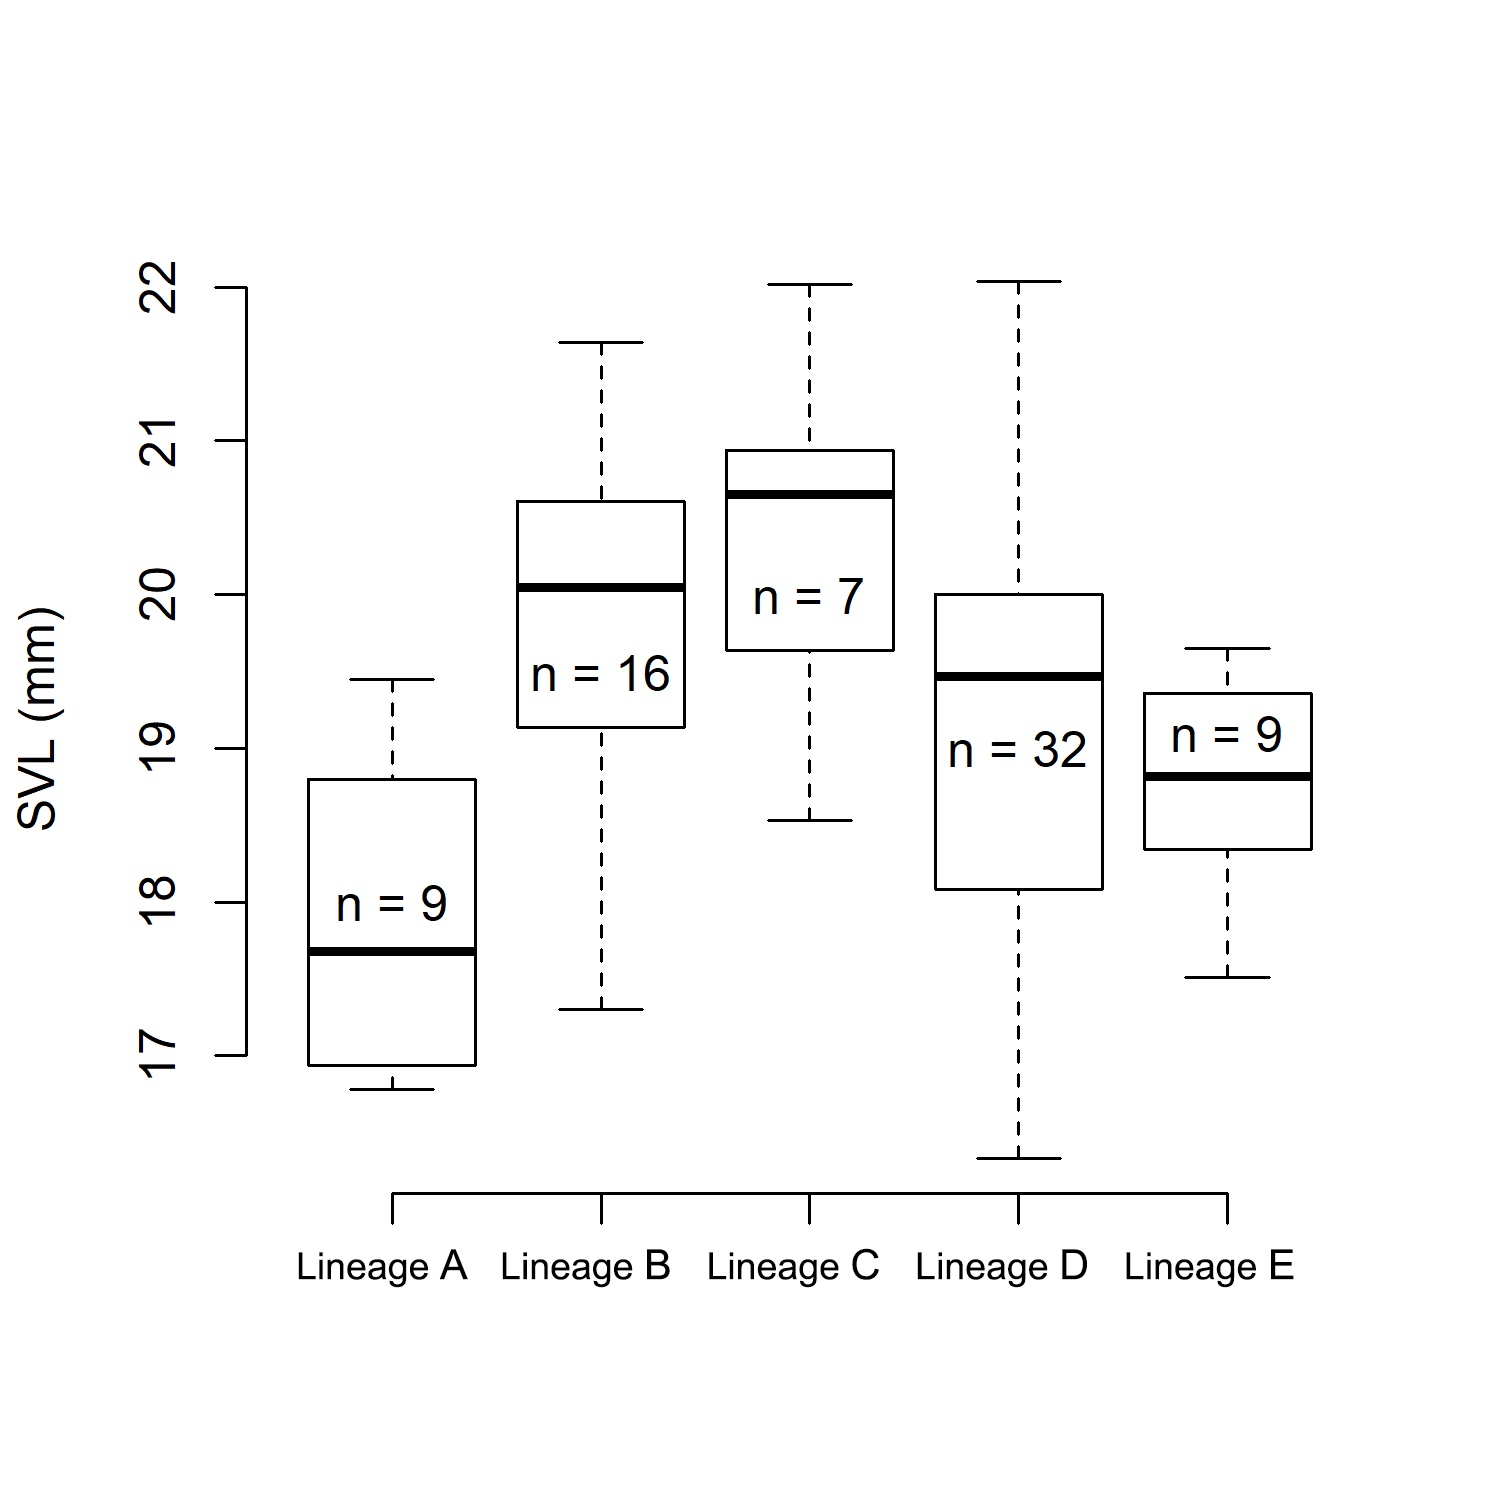

Supplement: s1 [file s1 › Figure_S7_svl.tif]
